# Supplementary material for: Laparoscopic Sleeve Gastrectomy in Patients with Severe Obesity Restores Adaptive Responses Leading to Nonalcoholic Steatohepatitis
Source: MDPI journal article supplement (doi:10.3390/ijms23147830), 2022-07-15
Supplement: s1 [file s1]

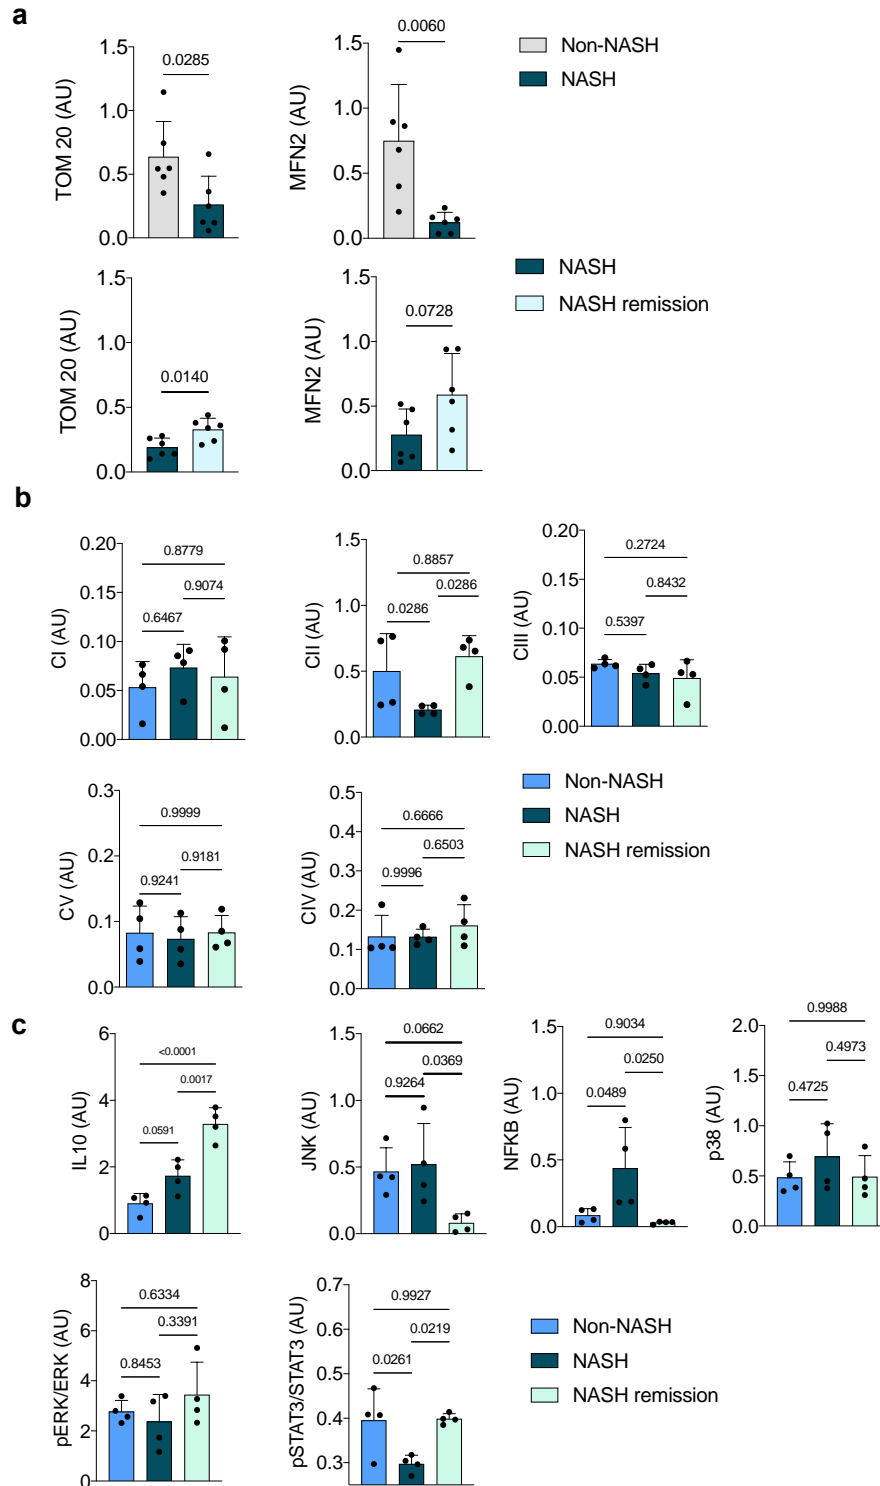

**Supplementary Figure S1. NASH remission is associated with reduced liver mitochondrial damage, oxidative stress and inflammation.** Western blot quantification for selected markers in the livers of patients with and without NASH and patients with NASH before and after surgery. P-values were calculated by the Mann-Whitney *U* test. Results are shown as means and SD.

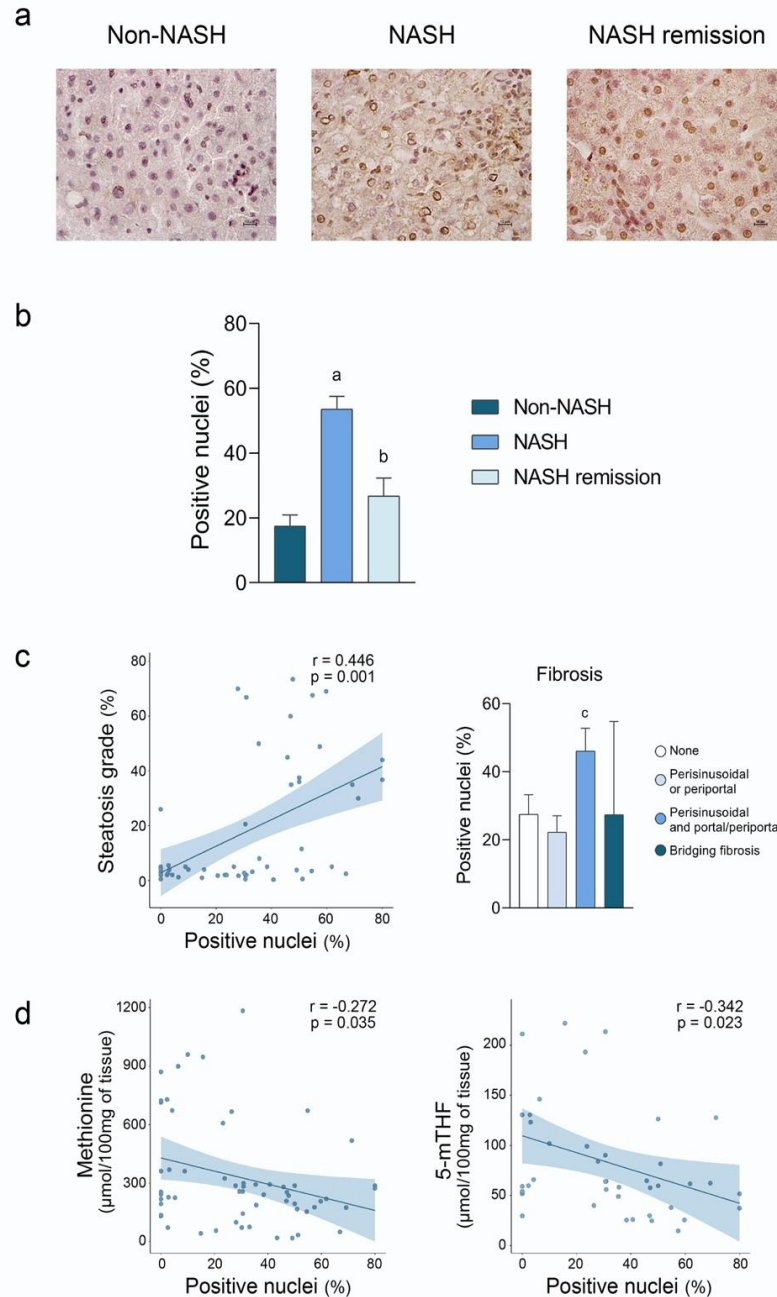

**Supplementary Figure S2. Terminal deoxynucleotidyl transferase-mediated dUTP nick end labelling (TUNEL) for the measurement of apoptotic nuclei.** (a) Representative micrographs corresponding to liver biopsies from a patient without NASH and 3.1% positive nuclei, a patient with NASH and 71.3% positive nuclei, and a post-surgery biopsy with 25.3% positive nuclei. Nuclei with positive staining appear brown. (b) Patients with NASH showed a significant increase in the proportion of nuclei positive for TUNEL compared to patients without NASH. These values decreased after surgery. (c) The proportion of TUNEL positive nuclei significantly correlated with the steatosis grade and was higher in patients with perisinusoidal and portal/periportal fibrosis. (d) The proportion of TUNEL positive nuclei showed inverse significant correlations with hepatic methionine and 5-methyl tetrahydrofolate (5-mTHF) concentrations. <sup>a</sup> at least  $p < 0.05$  with respect to patients without NASH; <sup>b</sup> at least  $p < 0.05$  with respect to patients with NASH; <sup>c</sup> at least  $p < 0.05$  with respect to patients without fibrosis or perisinusoidal or periportal fibrosis. P-values were calculated by the Mann-Whitney  $U$  test. Results are shown as means and SD. Correlations were calculated with the Spearman's rho test.

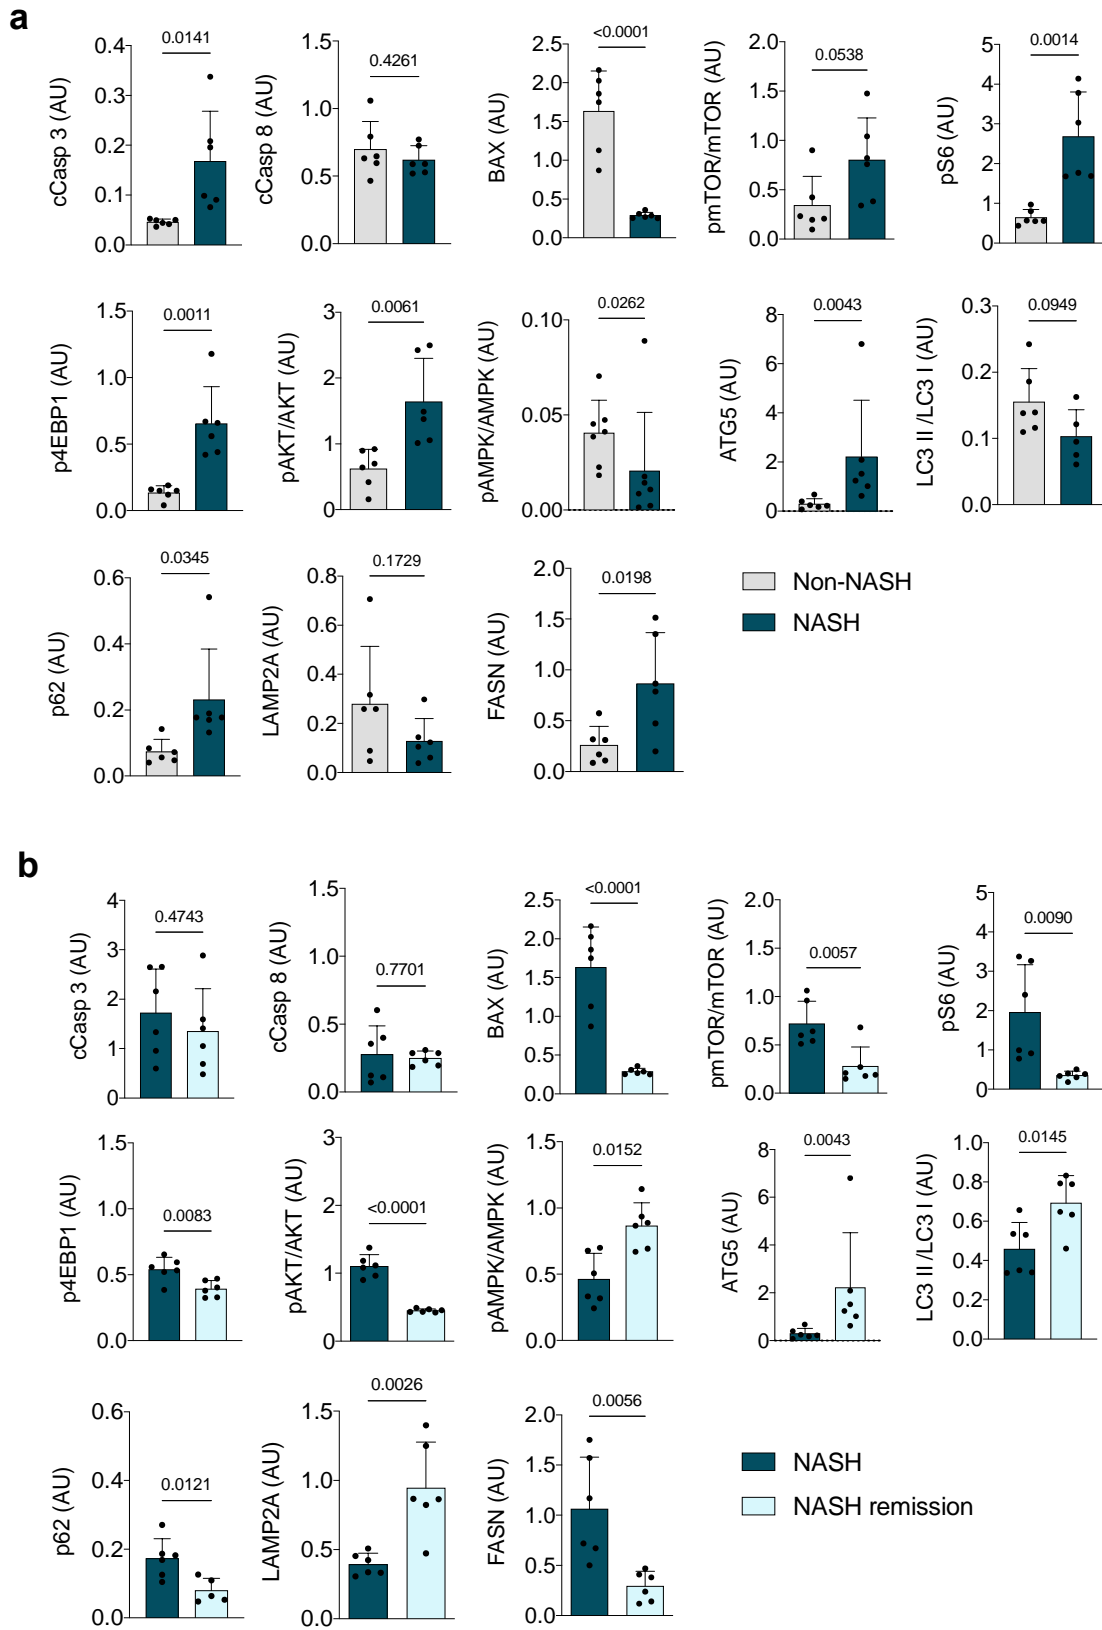

**Supplementary Figure S3. mTORC1 signalling and NASH remission.** Western blot quantification for selected markers in the livers of patients with and without NASH (a) and NASH patients before and after surgery (c). P-values were calculated by the Mann-Whitney *U* test. Results are shown as means and SD.

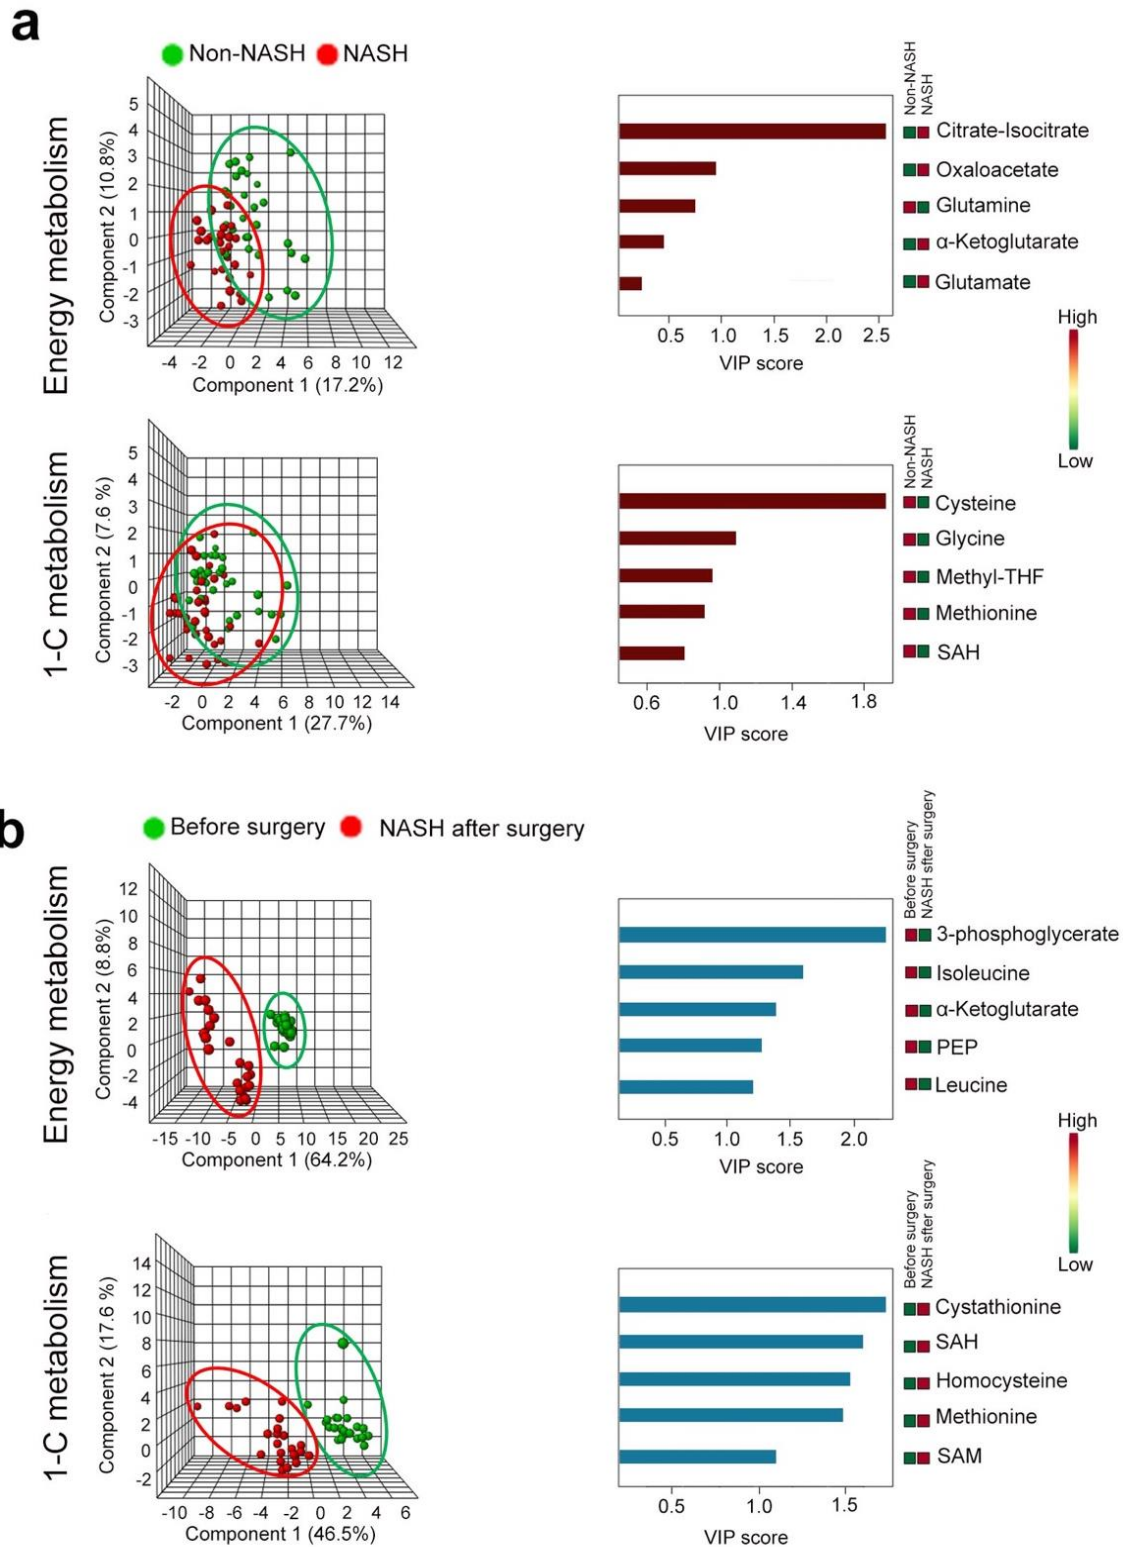

**Supplementary Figure S4. Energy and one-carbon metabolism distinguished livers of patients with and without NASH: the effect of NASH remission.** (a) Principal component analysis and variable importance scores in random forests indicated the relative importance of different metabolites in distinguishing the livers of patients with and without NASH. (b) The same analyses retained the importance of  $\alpha$ -KG-related metabolites and metabolites from the methionine cycle in metabolic reversal after NASH remission.

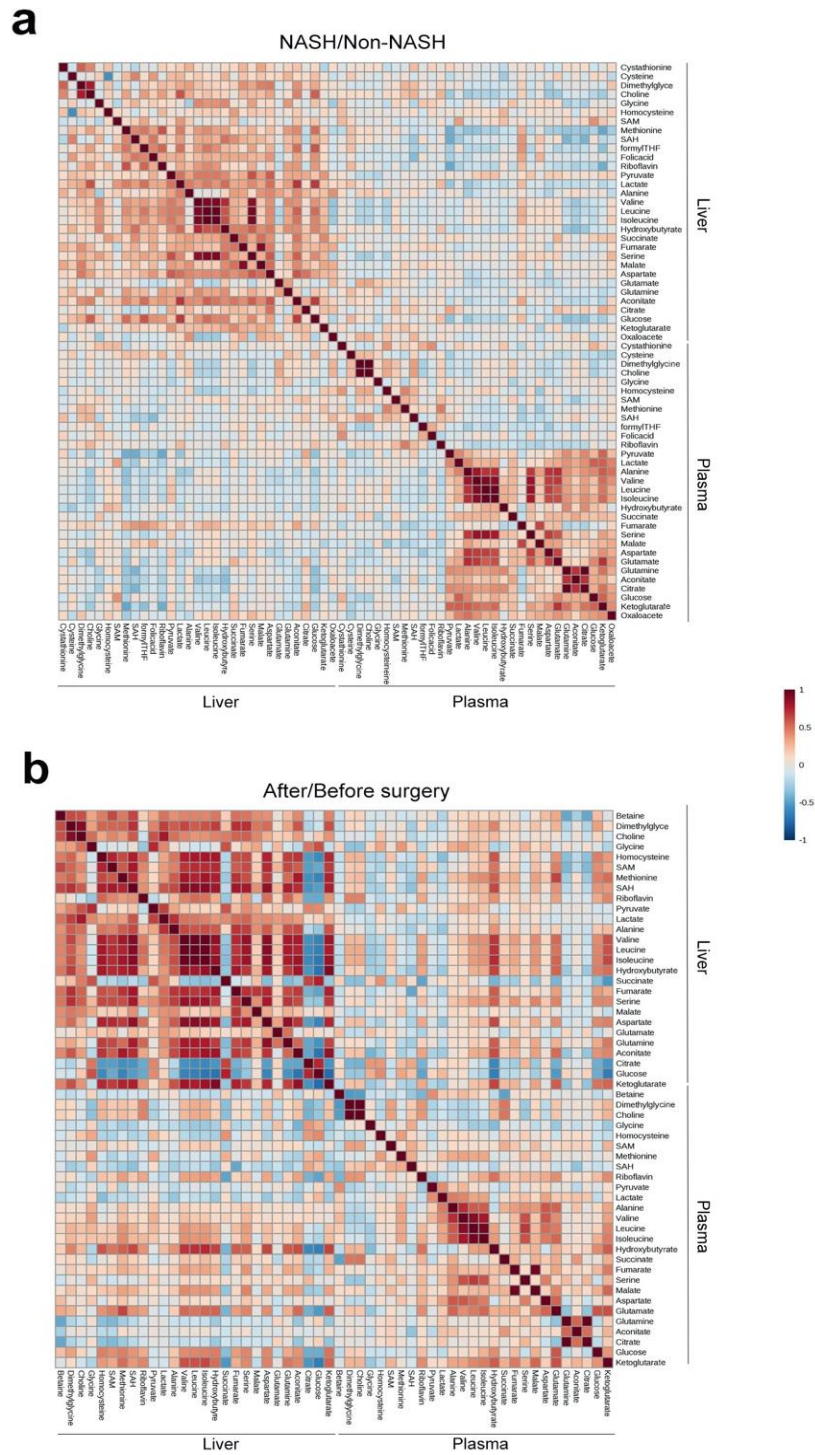

**Supplementary Figure S5. The reliability of plasma measurements compared with the liver metabolome.** Assessment of the reliability of linear regression estimates and exploratory factor analysis via a correlation matrix between the plasma and liver metabolites in (a) the livers of patients with and without NASH and (b) variations after NASH remission. Collectively, the data displayed a similar response of the metabolome in the plasma and liver. The effect of plasma fumarate on the levels of numerous liver metabolites appeared to be significant when comparing the livers of patients with and without NASH. Similarly,  $\alpha$ -KG, glutamine and hydroxybutyrate in the plasma might be associated with the metabolic response in NASH remission. Spearman's correlation was used to decrease susceptibility to outliers.



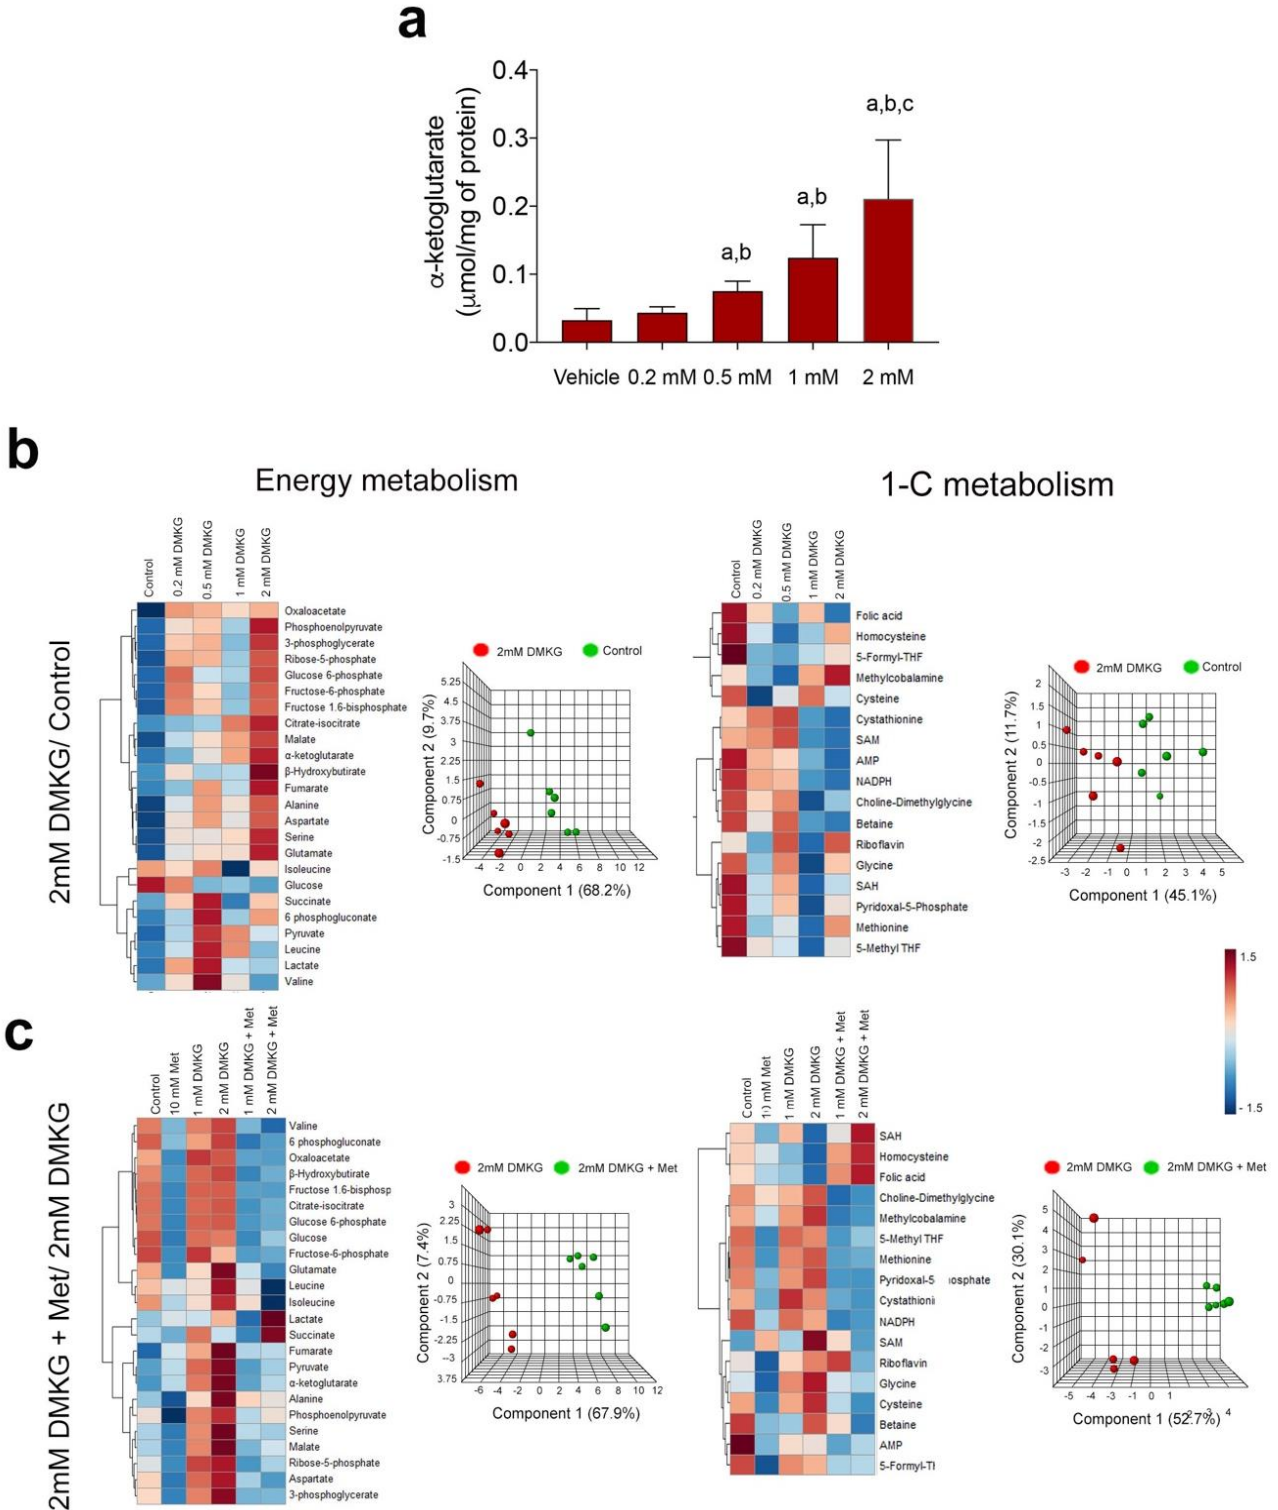

**Supplementary Figure S6. Increased hepatocyte  $\alpha$ -KG levels affect energy and one-carbon metabolism.** (a) Increasing (from 0.2 mM to 2 mM) supplementation with a cell-permeable  $\alpha$ -KG analog increased the intracellular  $\alpha$ -KG levels. <sup>a</sup>at least  $p < 0.05$  compared to the controls, <sup>b</sup>at least  $p < 0.05$  compared to 0.2 mM, <sup>c</sup>at least  $p < 0.05$  compared to 0.5 mM. (b) Heatmaps and principal component analysis indicated dose-dependent changes in metabolites that distinguished the treated and untreated cells. (c) The addition of metformin abrogated most metabolic changes induced by  $\alpha$ -KG supplementation. P-values are calculated by the Mann-Whitney  $U$  test. Results are shown as means and SD.

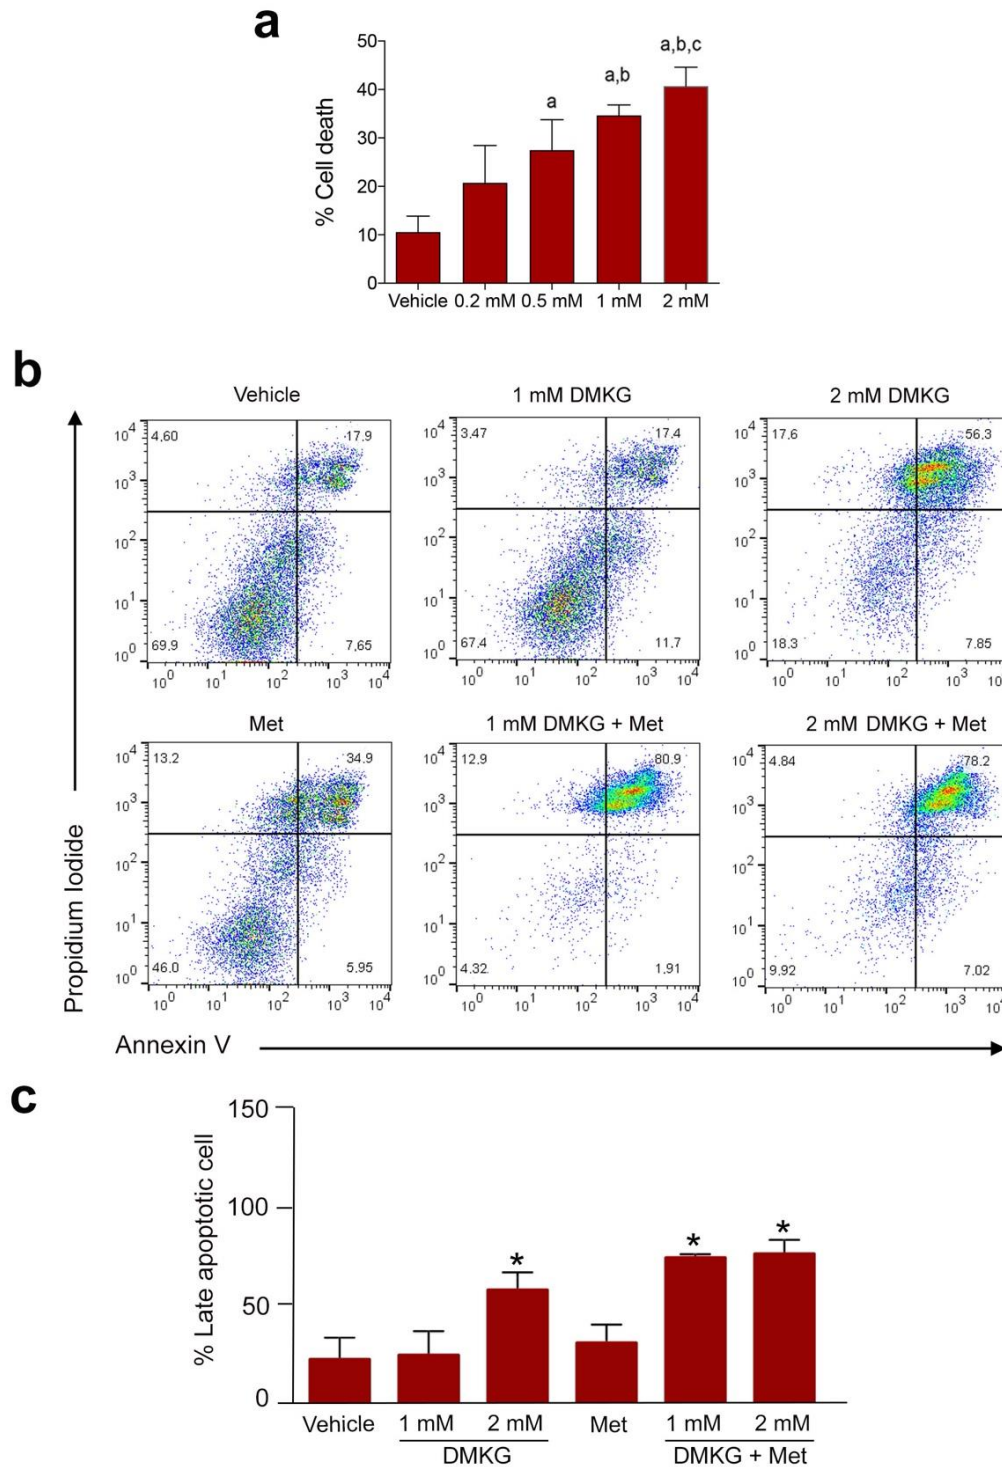

**Supplementary Figure S7. Increased hepatocyte  $\alpha$ -KG levels promote death in cultured hepatocytes.** (a) Increasing (from 0.2 mM to 2 mM) supplementation with a cell-permeable  $\alpha$ -KG analog increased cell death. <sup>a</sup>at least  $p < 0.05$  compared to controls, <sup>b</sup>at least  $p < 0.05$  compared to 0.2 mM, <sup>c</sup>at least  $p < 0.05$  compared to 0.5 mM. (b) Flow cytometry analysis of the cells stained with annexin V and propidium iodide indicated an increase in apoptosis caused by high intracellular  $\alpha$ -KG levels. (c) The number of late apoptotic cells confirmed that metformin may potentiate the effect of high  $\alpha$ -KG levels. Results expressed as mean  $\pm$  s.e.m.  $p$  values are determined by Wilcoxon rank-sum test (a) or \* $p < 0.05$  (ANOVA post hoc Bonferroni test in quintuplicate) in (c).

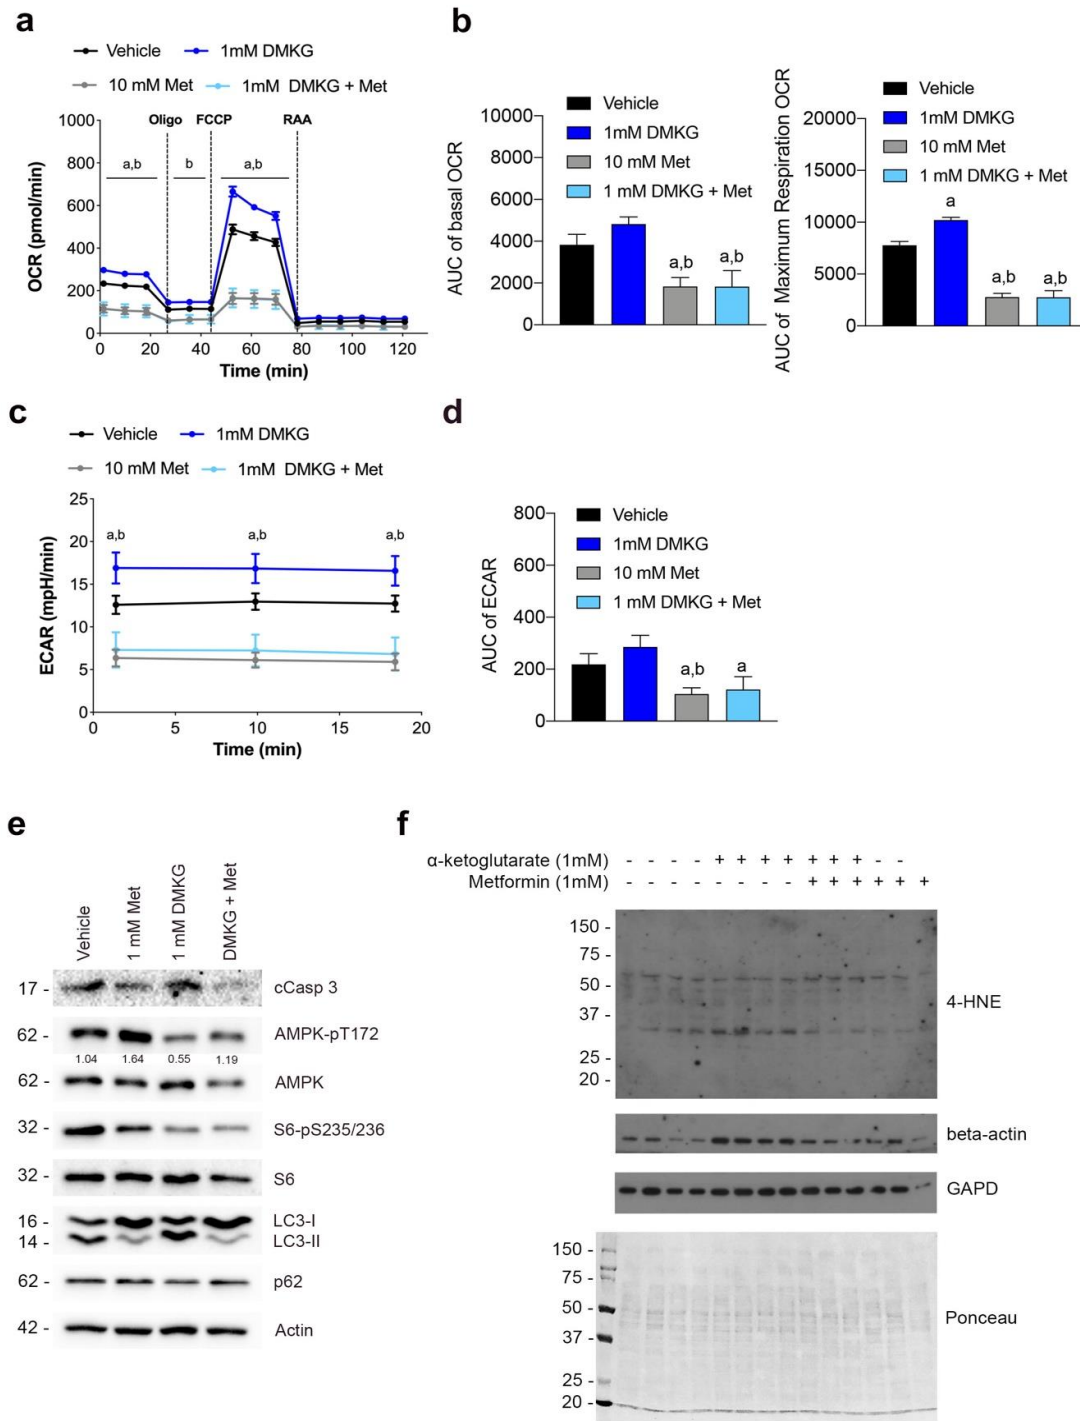

**Supplementary Figure S8. Metformin regulates mitochondrial function in primary hepatocytes cells.** (a,b). Oxygen consumption rate (OCR) and (c,d) extracellular acidification rate (ECAR) of primary hepatocytes cells revealed that supplementation with metformin abrogated  $\alpha$ -KG-induced key cellular functions, as mitochondrial respiration and glycolysis. (e) Representative western blots of selected markers indicated that metformin also abolishes these effects by increasing AMPK phosphorylation. (f) Representative western blots of 4-hydroxynonenal (4-HNE) showed that the increase of intracellular  $\alpha$ -KG did not alter the oxidative stress in the primary hepatocytes cells. <sup>a</sup> at least  $p < 0.05$  compared to control, <sup>b</sup> at least  $p < 0.05$  compared to 1 mM DMG, <sup>c</sup> at least  $p < 0.05$  compared to 10 mM metformin. Results expressed as mean  $\pm$  s.e.m.  $p$  values are determined by One or two-way ANOVA with Tukey's posthoc test.



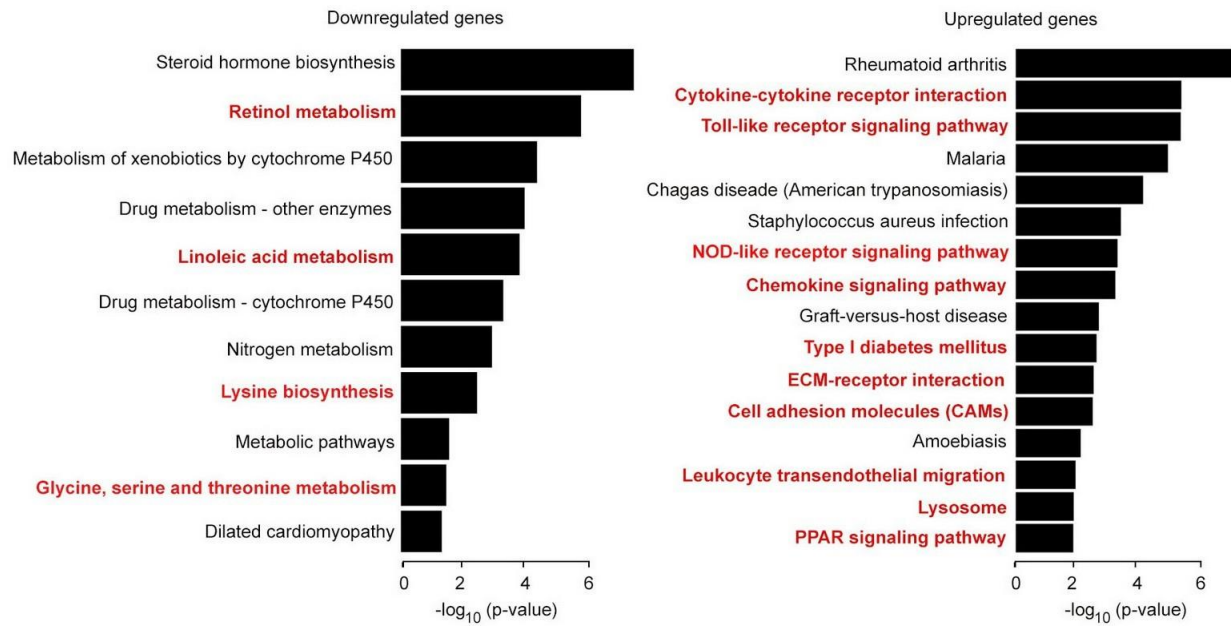

**Supplementary Figure S9. KEGG pathway analysis of NASH and non-NASH phenotypes.** The functional annotation of differentially expressed genes (upregulated and downregulated on the right and left, respectively) between patient cohorts indicated an association with biological processes involved in metabolism and disease.

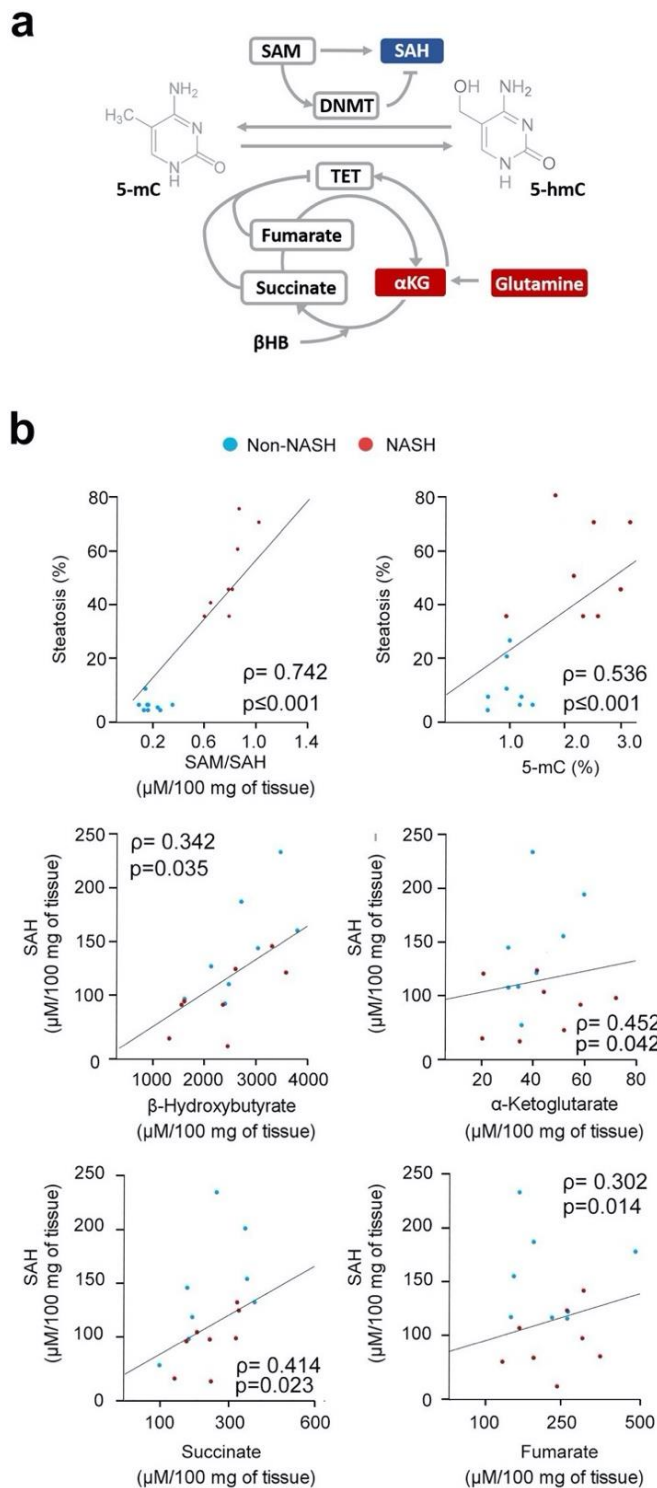

**Supplementary Figure S10. Metabolites influence DNA methylation.** (a) Several families of enzymes affect DNA methylation and require methyl donors and/or relative concentrations of mitochondrial metabolites. (b) Steatosis correlated with the amount of methyl donors and 5-methylcytosine. Hepatic mitochondrial metabolites are interrelated and distinguished the livers of patients with and without NASH. Correlations were calculated with the Spearman's rho test

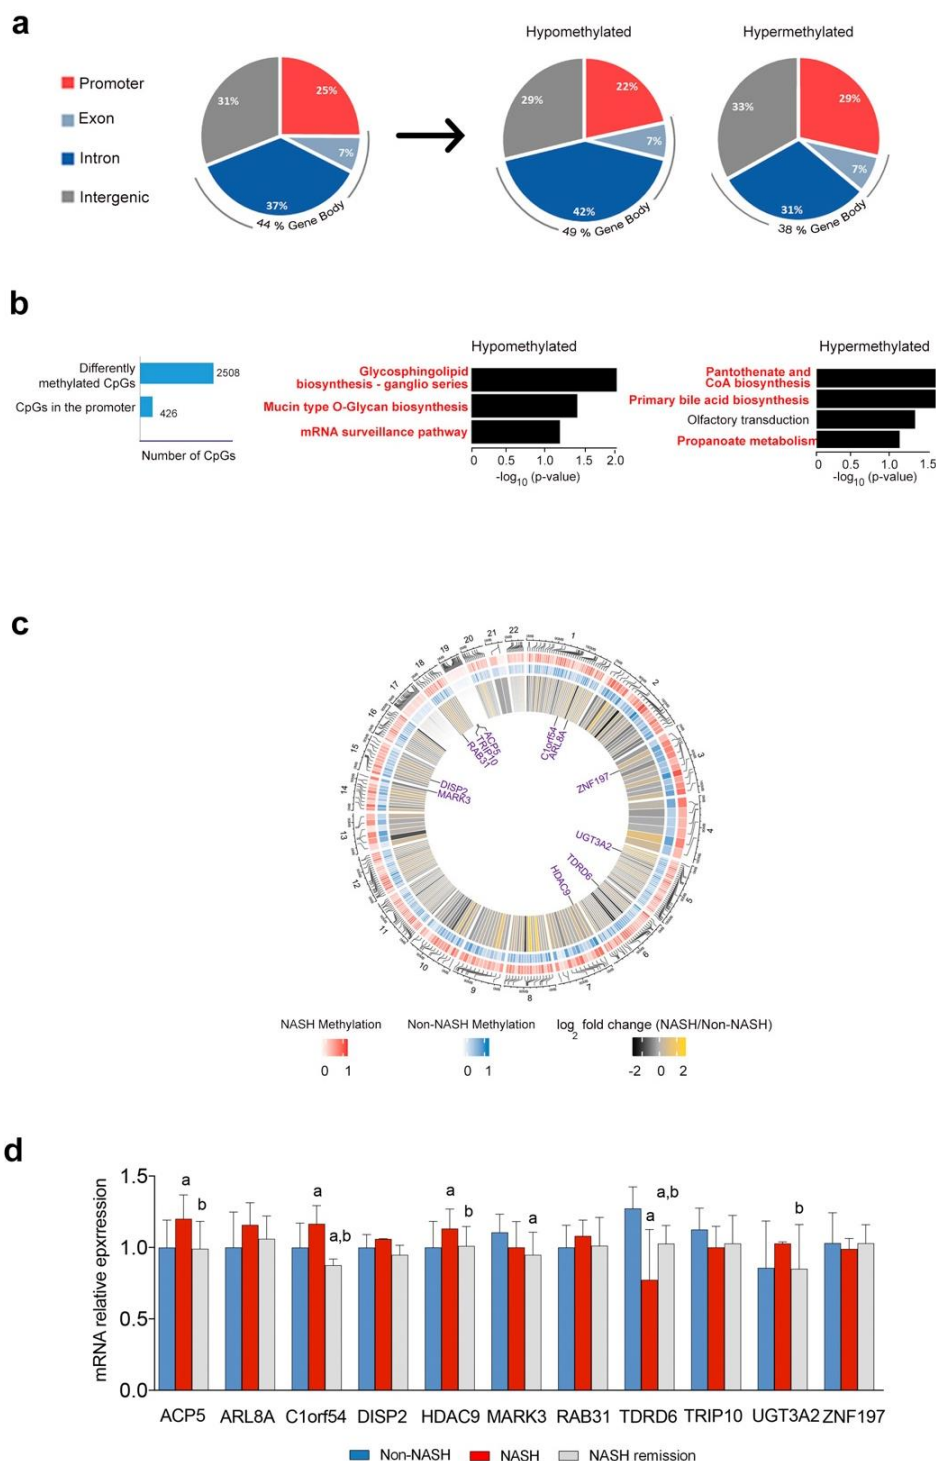

### Supplementary Figure S11. Methylated CpG sites in livers of patients with NASH are not uniformly distributed in the genome.

(a) Overall distribution of significantly differentially methylated CpG sites in promoter, exon, intron and intergenic regions indicated as percentages. (b) KEGG pathway analysis of gene expression in hypo- and hypermethylated promoter regions. Of the 2508 differentially methylated CpGs from the experiment, 426 are localised to promoters (we filtered for those annotated as TSS1500 or TSS200), as summarised in the blue bar chart on the left. (c) Circos plot showing chromosome locations of the subset of 367 CpGs for which we have mRNA microarray data (of the 426 from (b)) from Figures 7 and S8, with red and blue layers indicating localization and methylation levels in NASH and Non-NASH patients, respectively. The interior layer shows log<sub>2</sub> (fold-change) in mRNA levels between NASH and Non-NASH patients, and text labels indicate CpGs highlighted in purple in Figure 7e. (d)

Transcriptome response in selected genes using quantitative real-time PCR. <sup>a</sup> At least  $p < 0.05$  compared to non-NASH livers, <sup>b</sup> at least  $p < 0.05$  compared to NASH livers. Results expressed as means and SD.  $p$  values are determined by Wilcoxon rank-sum test.

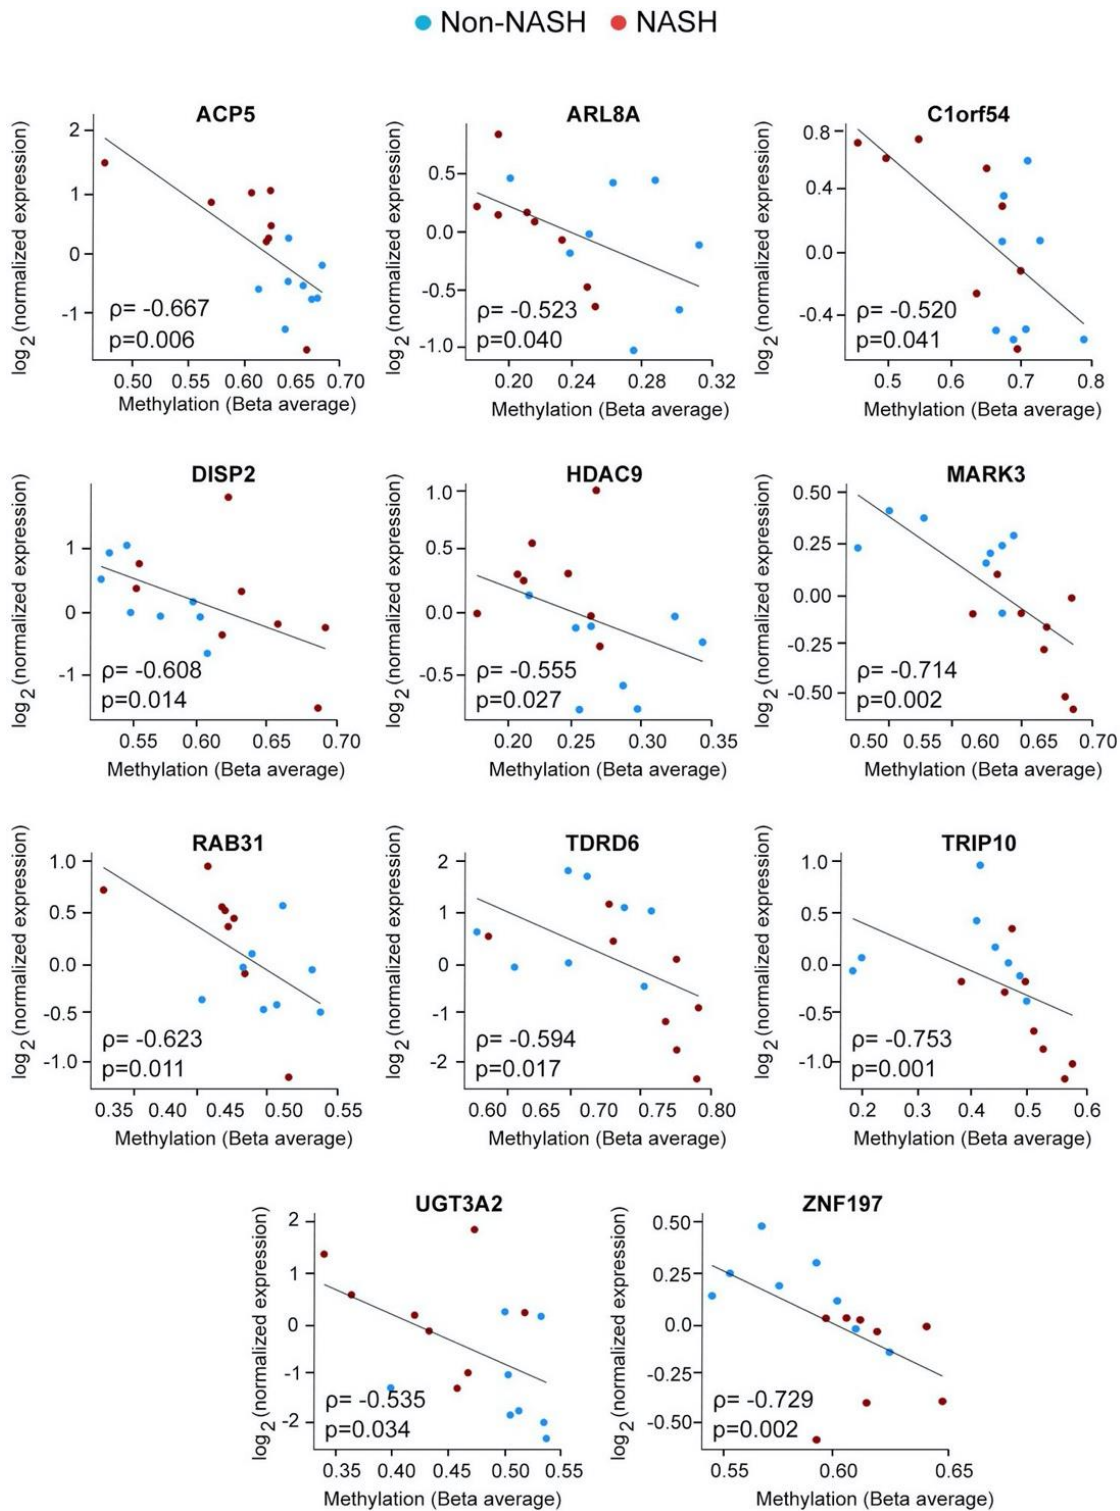

**Supplementary Figure S12. Representative DNA methylation and mRNA expression measured in candidate CpG sites located in promoter regions.** Spearman's correlation plots of DNA methylation (beta average) versus gene expression ( $\log_2$  expression) in the livers of patients with and without NASH for the 11 candidates with inverse correlation between DNA methylation and mRNA expression. p-values determined by Spearman `cor.test()` in R. ACP5, acid phosphatase 5, tartrate-resistant; ARL8A, ADP ribosylation factor-like GTPase 8A; C1orf54, chromosome 1 open reading frame 54; DISP2, dispatched RND transporter family member 2; HDAC9, histone deacetylase 9; MARK3, microtubule affinity-regulating kinase 3; RAB31– RAB31, member RAS oncogene family; TDRD6, tudor domain-containing 6; TRIP10, thyroid hormone receptor interactor 10; UGT3A2, UDP glycosyltransferase family 3 member A2; ZNF197, zinc finger protein 197.

**Supplementary Figure S13.** Uncropped western blots corresponding to the main figures. M: Western blot protein marker. The numbers to the left of the blots are the molecular weights.

**Figure 1b**

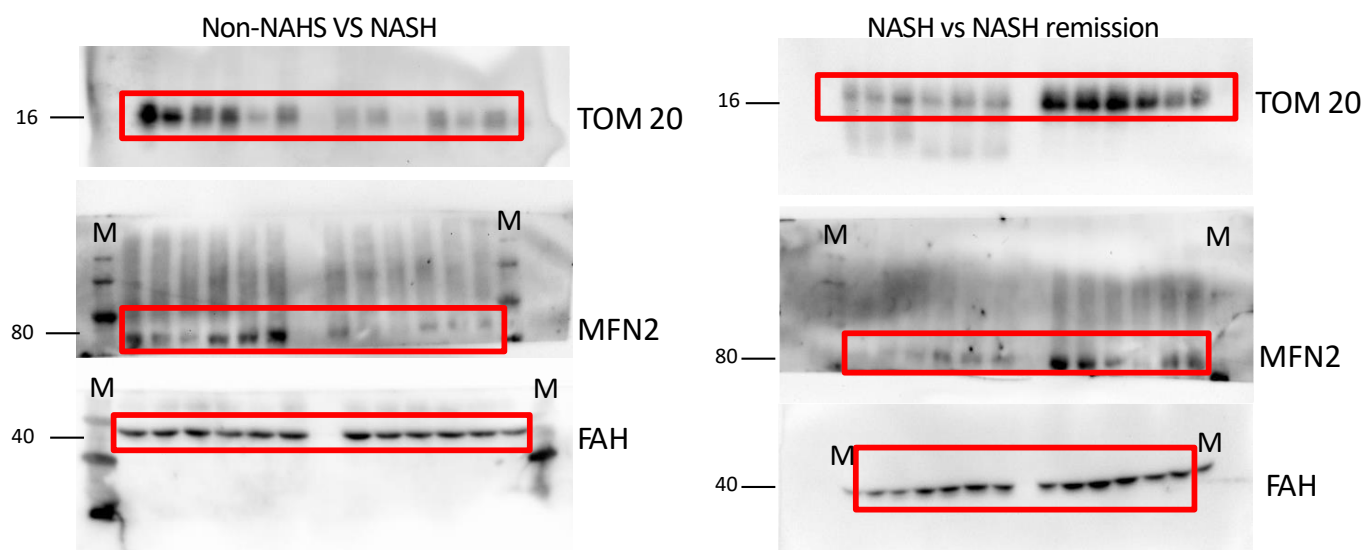

**Figure 1c**

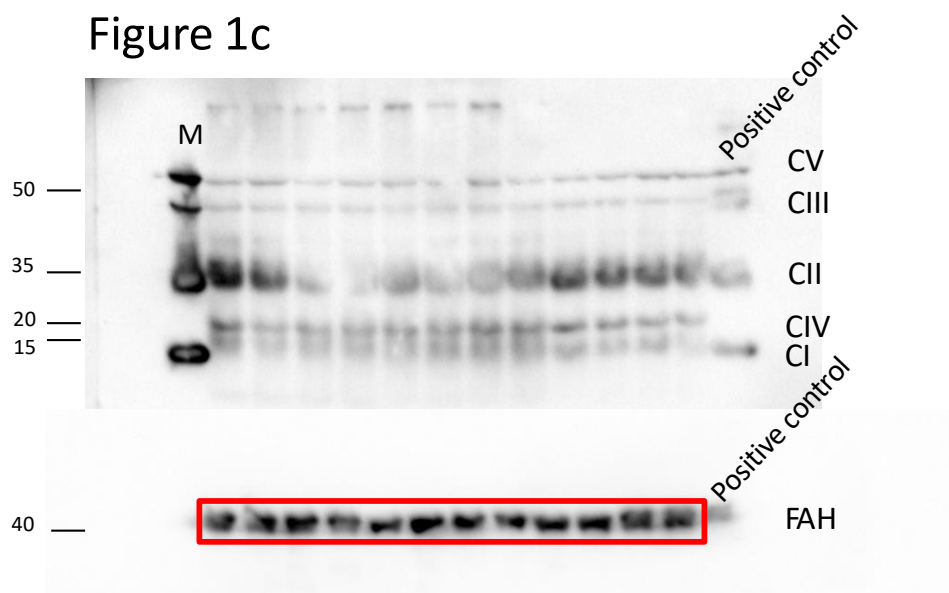



Figure 2b

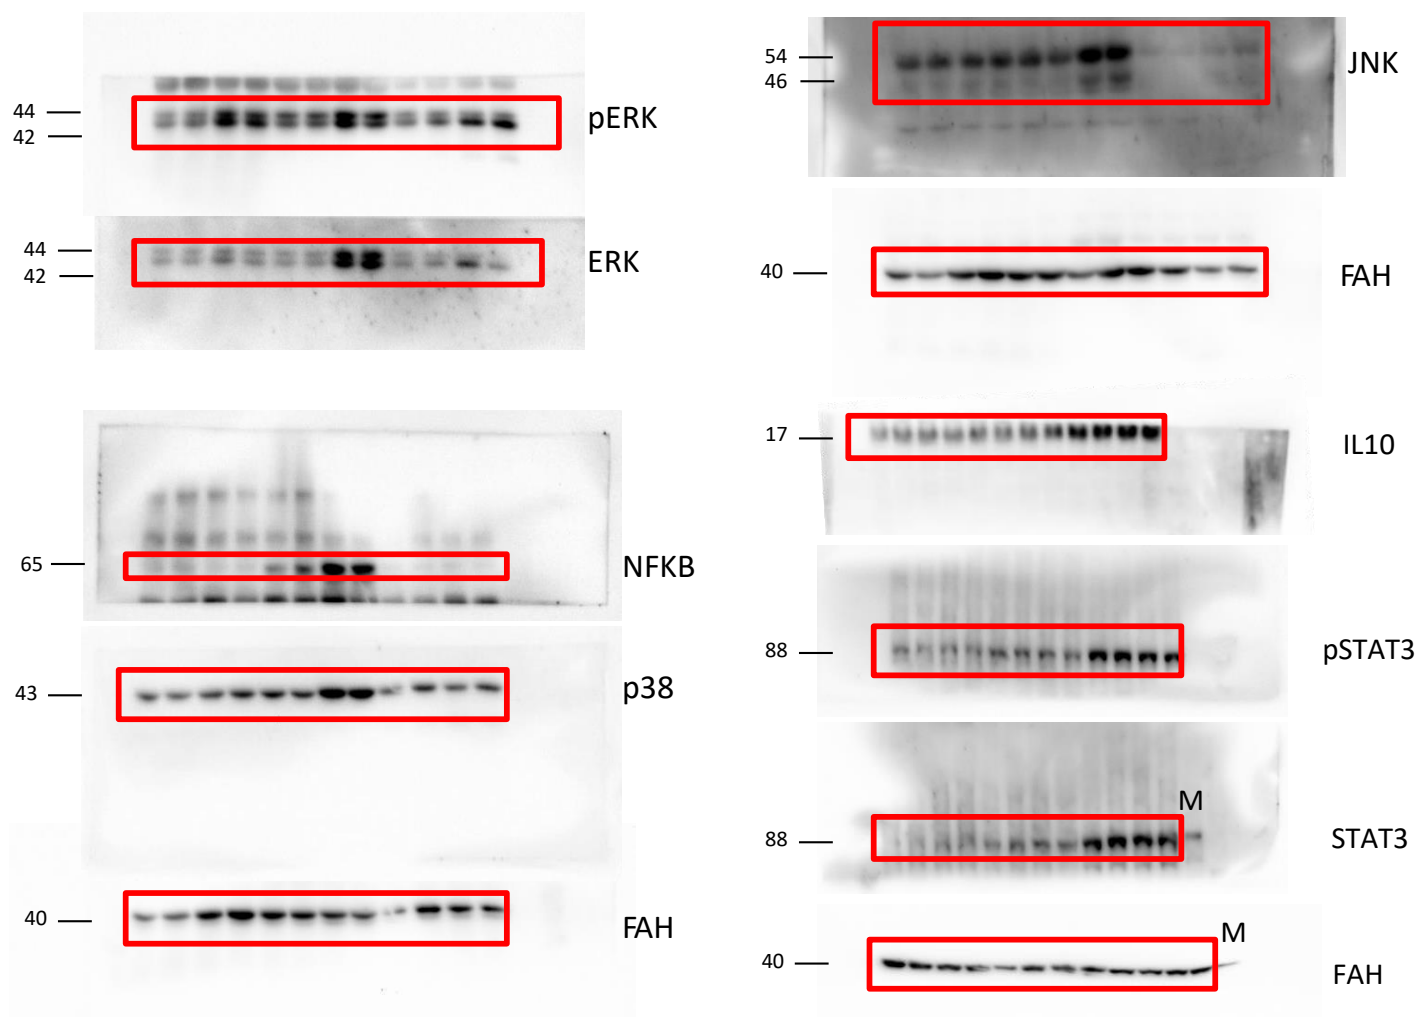

Figure 3B

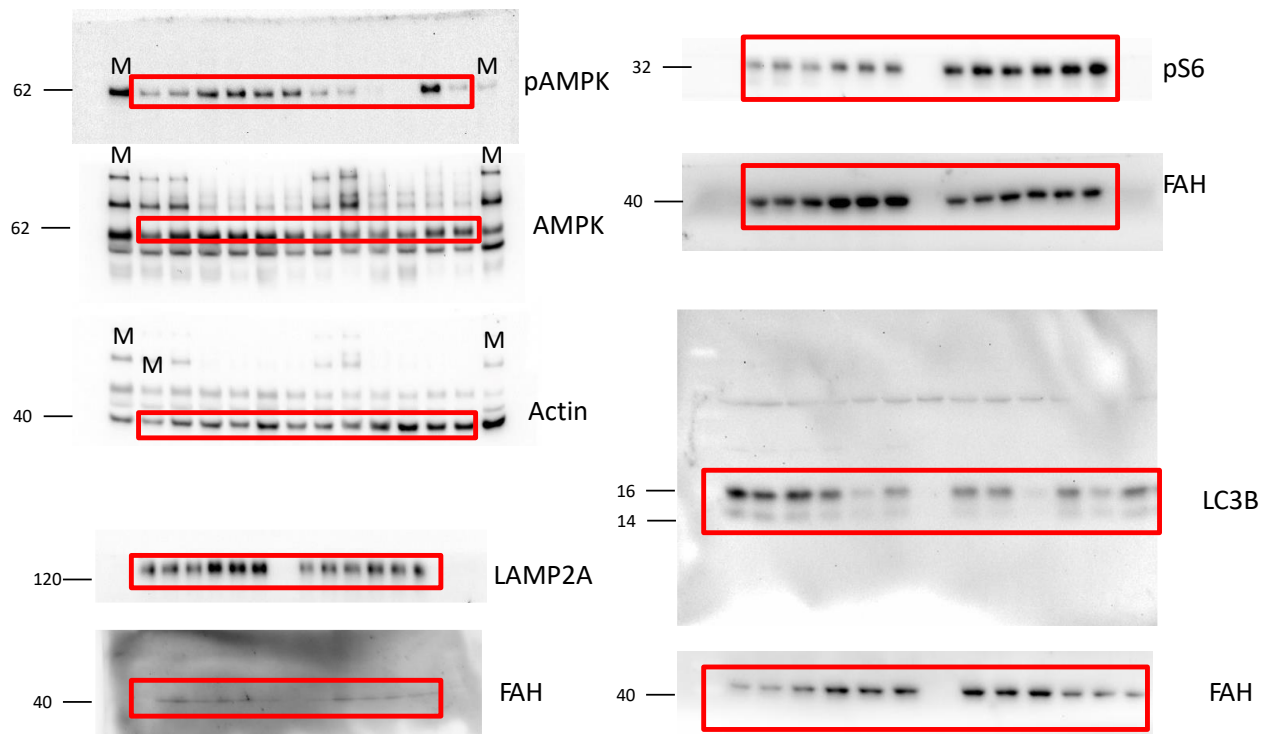

Figure 3B

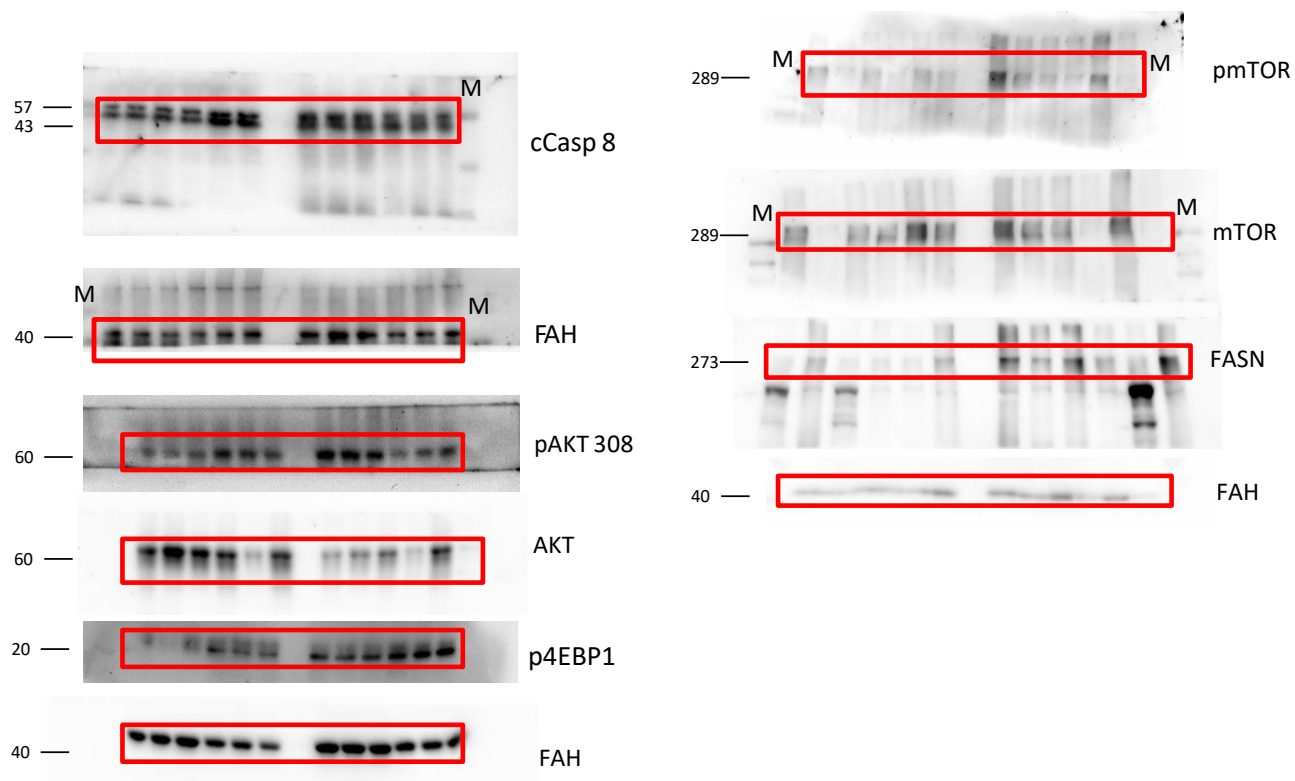

Figure 3B

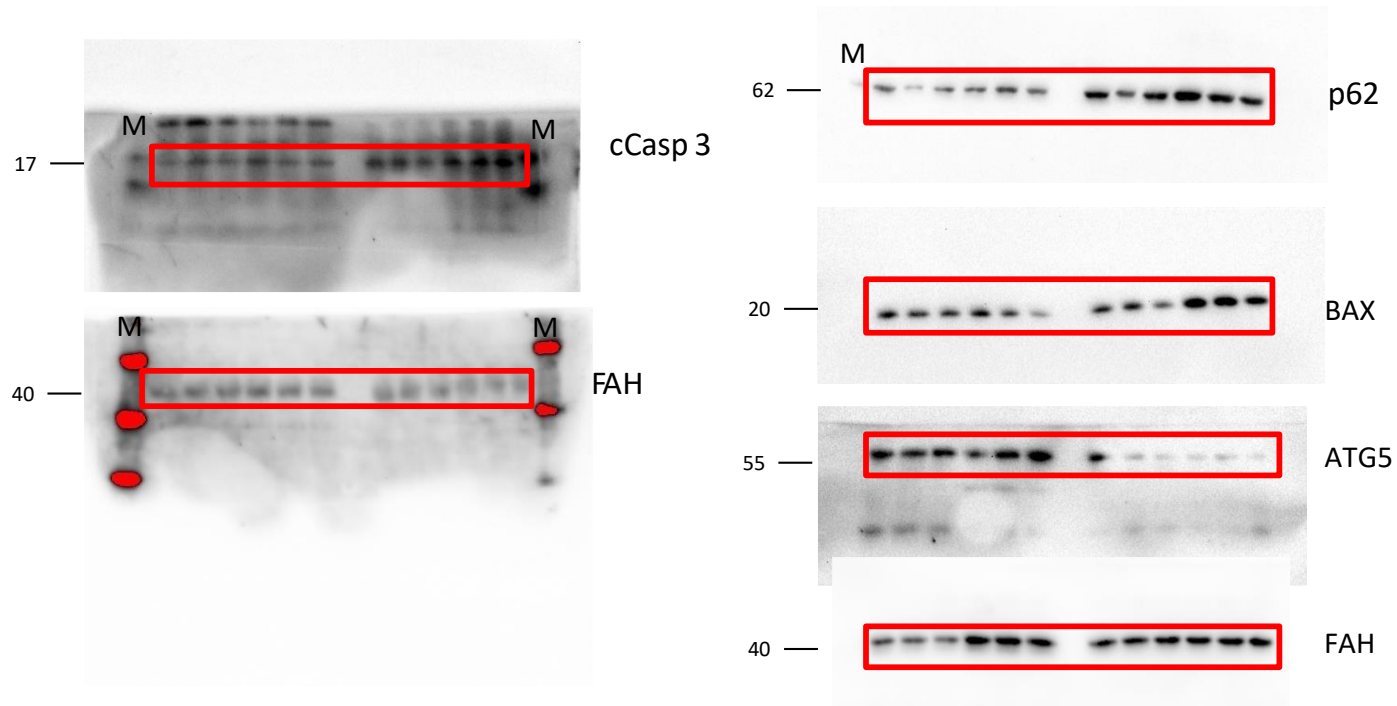

Figure 3D

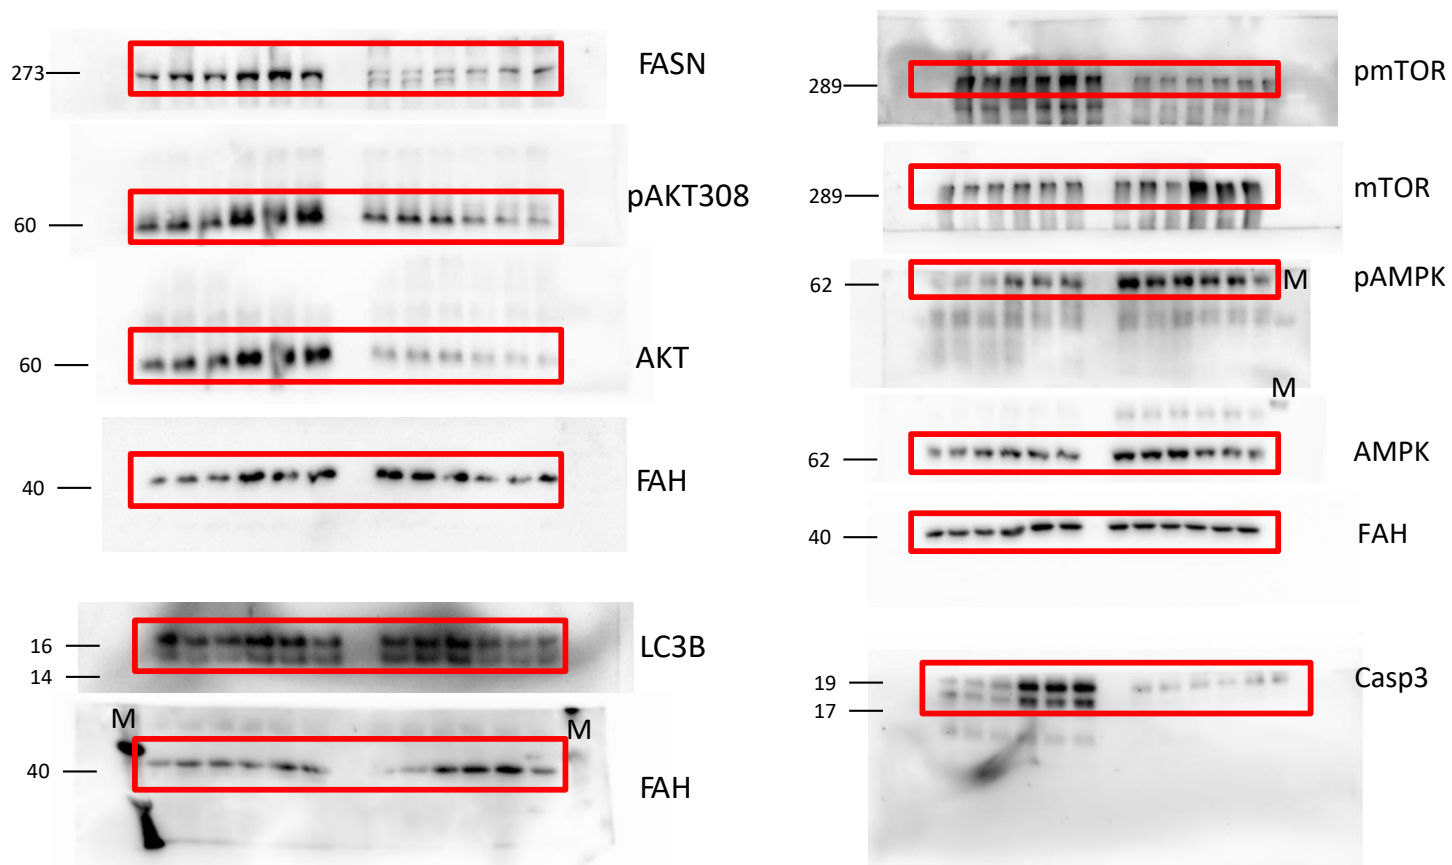

Figure 3D

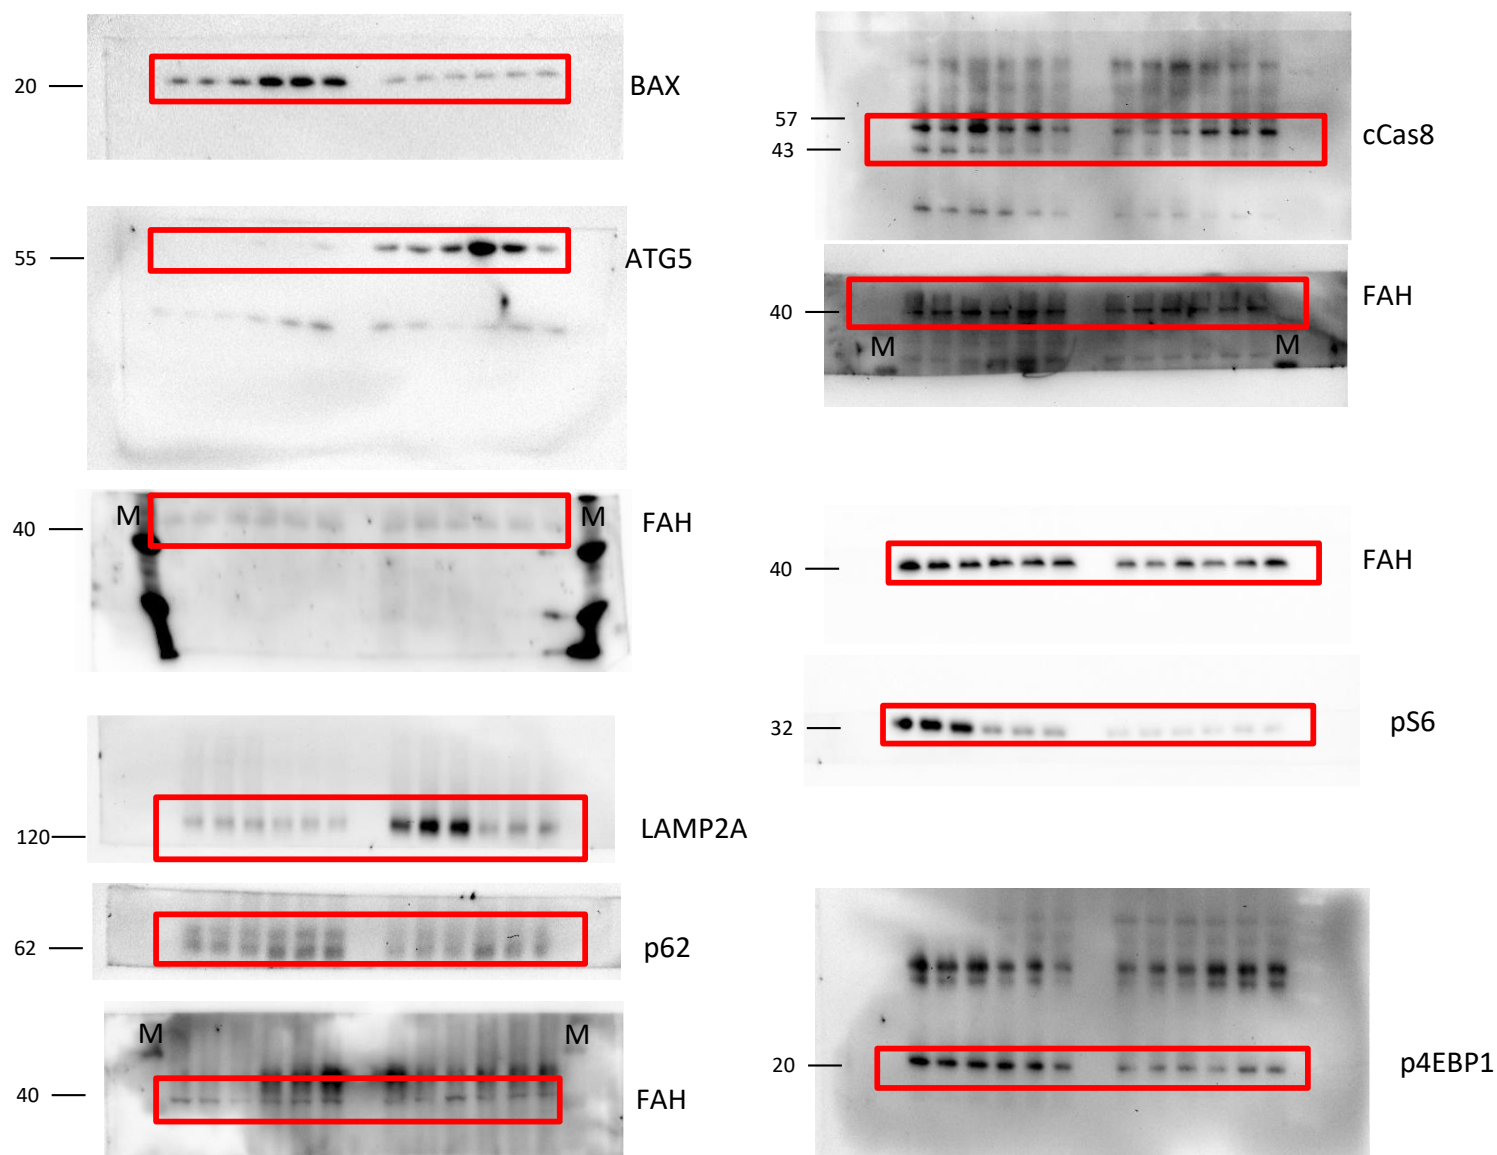

Figure 5c

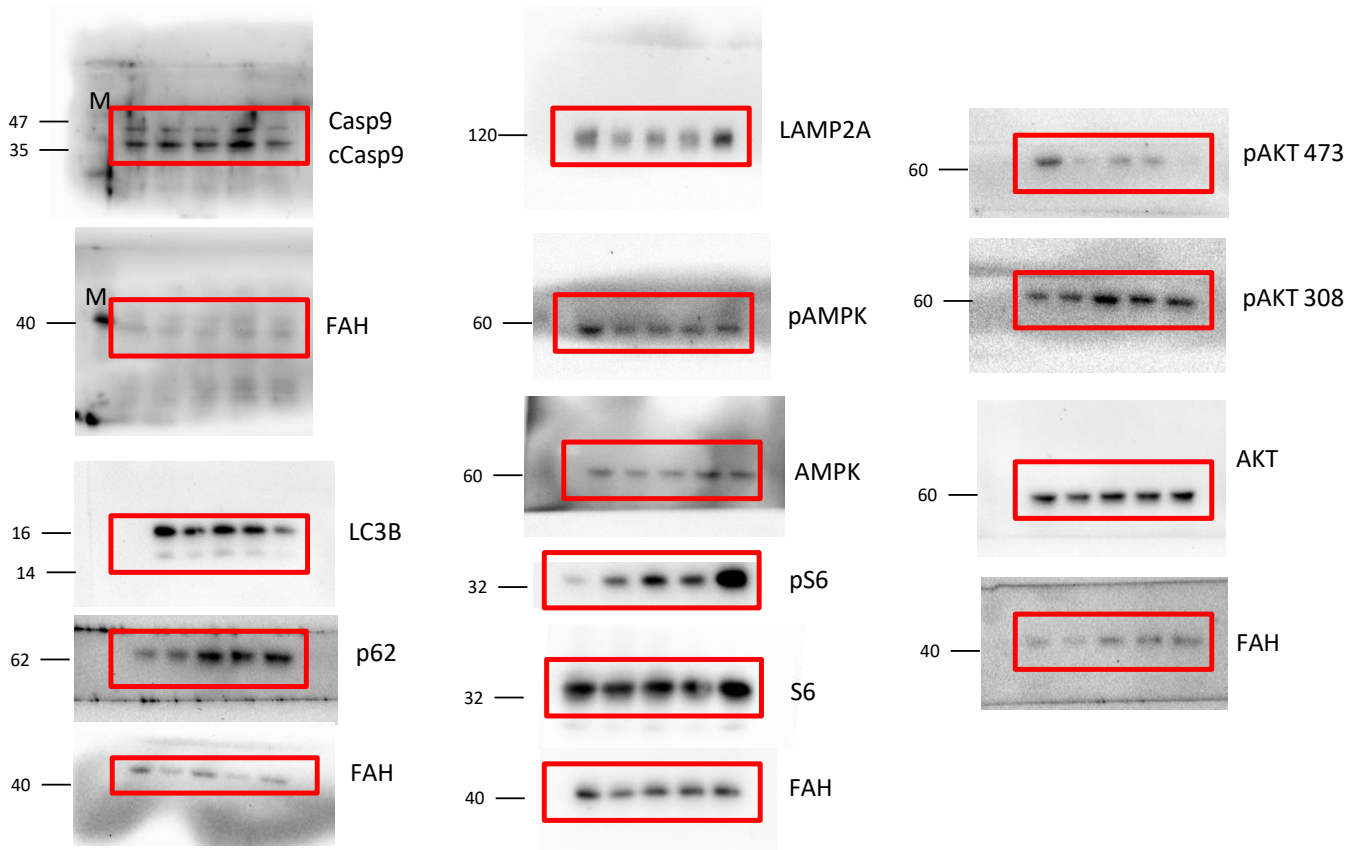

Figure 5c

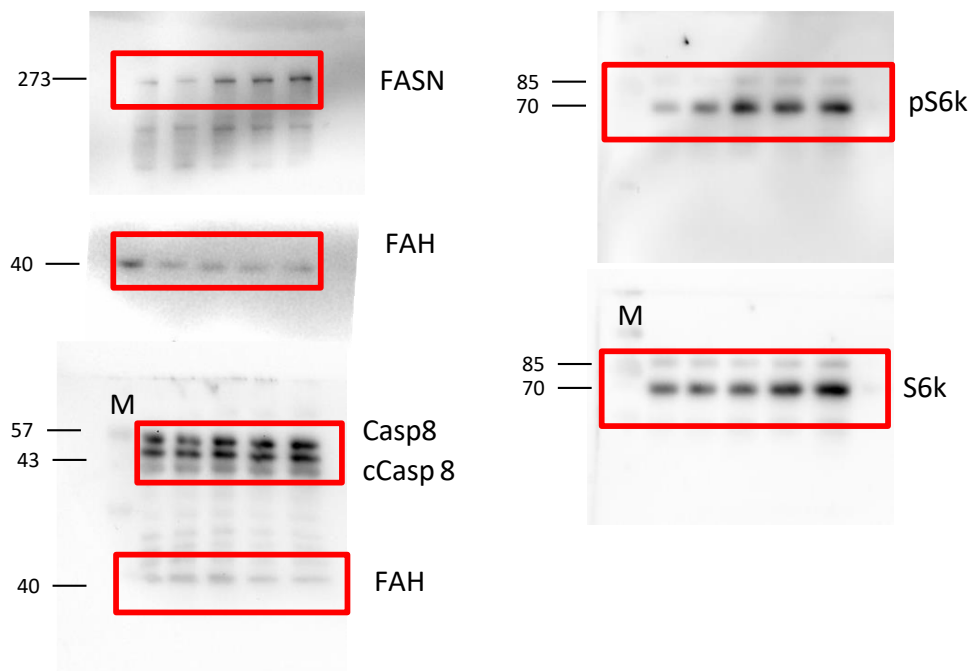



Figure 5d

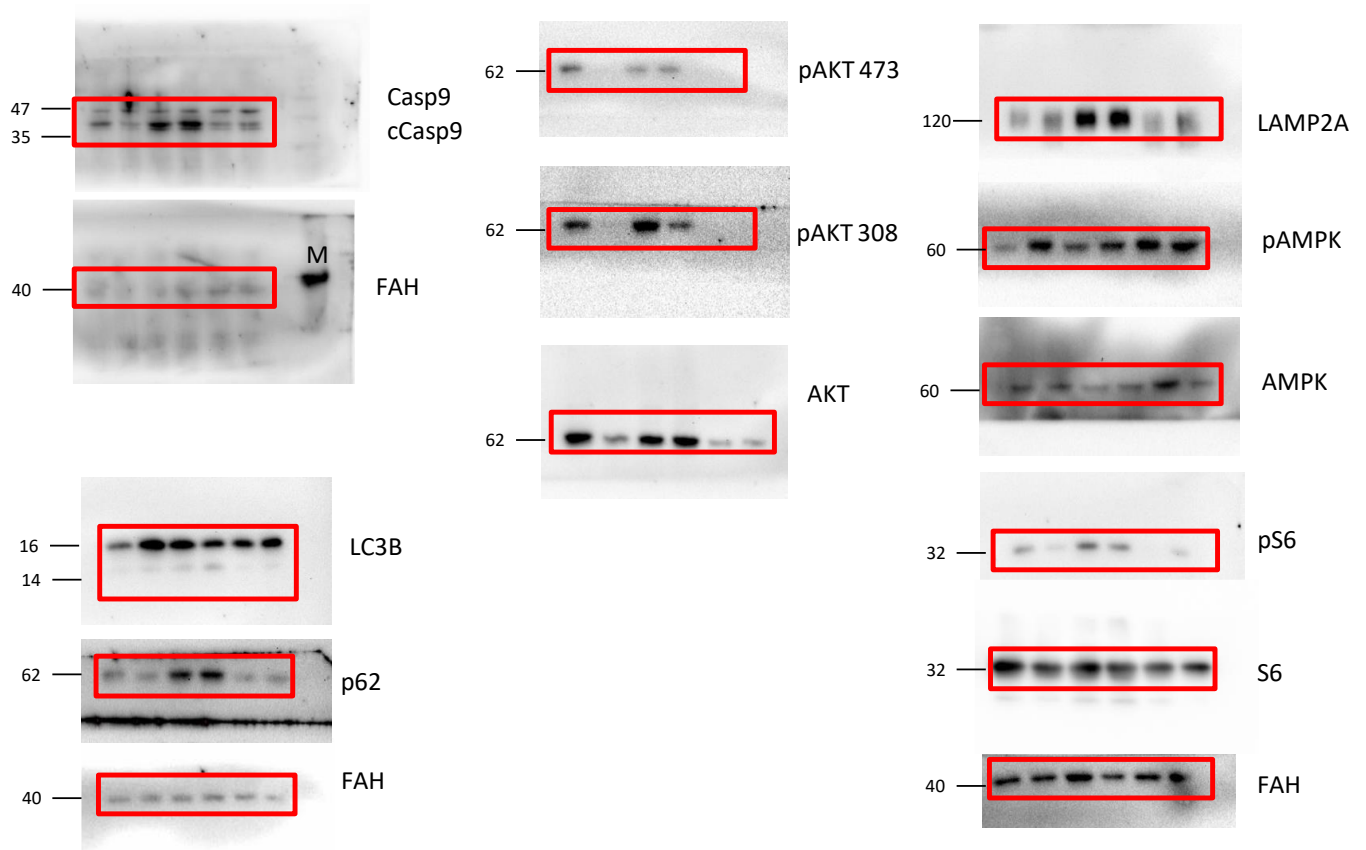

Figure 5d

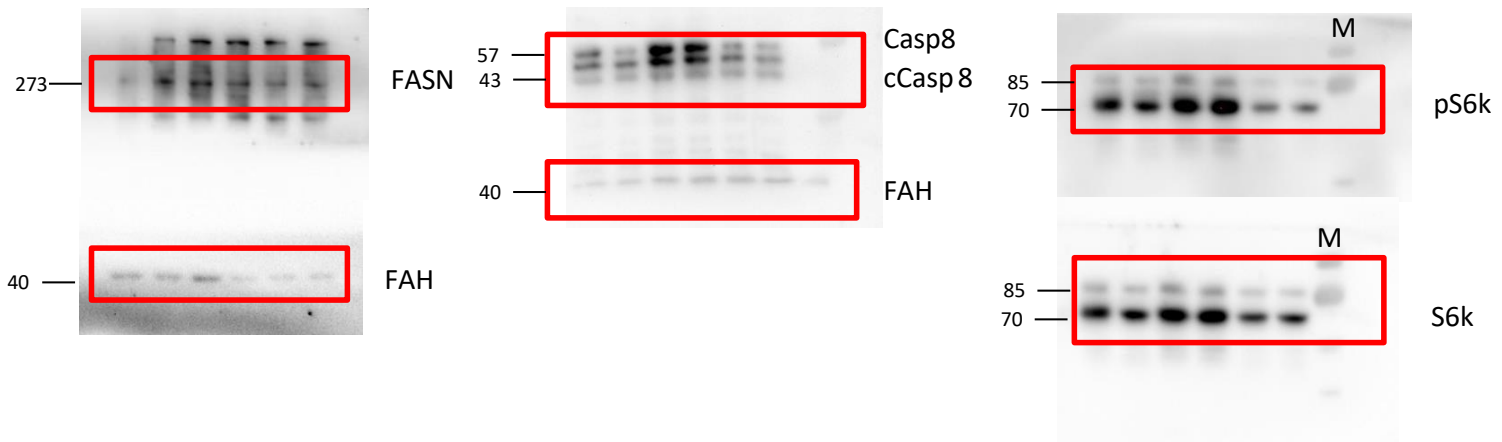

**Supplementary Table S1.** Clinical, laboratory assessment and liver histological features in patients with severe obesity comparing matched patients with and without NASH. NASH patients were reexamined one year after surgery

|                                   | Non-NASH (NAS ≤ 2)<br>(n=31) | NASH (NAS ≥ 5)<br>(n=31)        | One-year after surgery<br>(n=31) |
|-----------------------------------|------------------------------|---------------------------------|----------------------------------|
| <b>Clinical characteristics</b>   |                              |                                 |                                  |
| Male, n (%)                       | 10 (32.3)                    | 10 (32.3)                       | -                                |
| Age, years                        | 46.0 (39.0-56.0)             | 49.0 (44.0-56.0)                | -                                |
| BMI, Kg/m <sup>2</sup>            | 44.0 (41.4-46.4)             | 46.5 (42.6-53.6)                | 31.4 (28.7-33.4) <sup>b, c</sup> |
| T2DM, n (%)                       | 11 (35.5)                    | 17 (54.8)                       | 4 (12.9) <sup>b, c</sup>         |
| Hypertension, n (%)               | 17 (54.8)                    | 21 (67.7)                       | 10 (32.3) <sup>b, c</sup>        |
| Dyslipidaemia, n (%)              | 9 (29.0)                     | 12 (38.7)                       | 2 (6.5) <sup>b, c</sup>          |
| <b>Medication (%)</b>             |                              |                                 |                                  |
| Metformin                         | 4 (12.9)                     | 12 (38.7) <sup>a</sup>          | 4 (12.9) <sup>b, c</sup>         |
| Insulin                           | 2 (6.5)                      | 5 (16.1)                        | 1 (3.2) <sup>b, c</sup>          |
| Sulfonylureas                     | 1 (3.2)                      | 2 (6.5)                         | -                                |
| ACEIs + ARA-II                    | 11 (35.5)                    | 14 (45.2)                       | 4 (12.9) <sup>b, c</sup>         |
| Diuretics                         | 4 (12.9)                     | 5 (16.1)                        | -                                |
| Statins                           | 5 (16.1)                     | 5 (16.1)                        | 2 (6.5) <sup>b, c</sup>          |
| <b>Laboratory assessment</b>      |                              |                                 |                                  |
| Hemoglobin, g/dL                  | 13.2 (12.7-14.7)             | 13.4 (12.7-14.8)                | 13.1 (12.3-14.0)                 |
| Leukocytes, x10 <sup>9</sup> /L   | 7.5 (6.3-9.4)                | 7.6 (6.5-10.7)                  | 6.0 (5.0-7.5) <sup>c</sup>       |
| Platelets, x10 <sup>9</sup> /L    | 197 (187-266)                | 243 (181-314)                   | 227 (209-251)                    |
| Ferritin, µg/L                    | 44.4 (25.0-143.7)            | 112.4 (31.2-203.3)              | 32.2 (12.2-85.5) <sup>b, c</sup> |
| Total-cholesterol, mmol/L         | 4.3 (3.4-5.2)                | 4.3 (3.8-5.0)                   | 4.8 (4.1-5.4)                    |
| HDL-cholesterol, mmol/L           | 1.2 (0.9-1.6)                | 1.2 (0.9-1.4)                   | 1.5 (1.3-1.7) <sup>c</sup>       |
| LDL-cholesterol, mmol/L           | 2.4 (1.9-2.8)                | 2.6 (2.4-3.7) <sup>a</sup>      | 2.8 (2.3-3.3)                    |
| Triglycerides, mmol/L             | 1.5 (1.0-2.3)                | 1.7 (1.3-2.5) <sup>a</sup>      | 0.9 (0.6-1.4) <sup>b, c</sup>    |
| Glucose, mmol/L                   | 6.5 (6.1-8.9)                | 7.6 (6.2-8.7) <sup>a</sup>      | 4.5 (4.3-5.1) <sup>b, c</sup>    |
| Insulin, pmol/L                   | 90.9 (28.3-140.3)            | 108.0 (48.7-143.7) <sup>a</sup> | 40.9 (20.9-58.6) <sup>b, c</sup> |
| HOMA-IR                           | 4.1 (1.3-6.3)                | 6.7 (2.7-8.1) <sup>a</sup>      | 1.2 (0.6-1.9) <sup>b, c</sup>    |
| Albumin, g/L                      | 44.0 (41.0-45.0)             | 43.0 (41.0-46.0)                | 42.0 (41.0-44.0)                 |
| AST, µkat/L                       | 0.5 (0.4-0.7)                | 0.7 (0.5-1.3) <sup>a</sup>      | 0.3 (0.2-0.3) <sup>b, c</sup>    |
| ALT, µkat/L                       | 0.5 (0.3-0.7)                | 0.7 (0.5-1.4) <sup>a</sup>      | 0.2 (0.2-0.3) <sup>b, c</sup>    |
| GGT, µkat/L                       | 0.3 (0.2-0.5)                | 0.5 (0.3-0.8) <sup>a</sup>      | 0.2 (0.1-0.5) <sup>c</sup>       |
| CRP, mg/L                         | 0.9 (0.5-1.5)                | 1.9 (0.6-1.5) <sup>a</sup>      | 0.4 (0.2-0.4) <sup>b, c</sup>    |
| <b>Liver histologic features</b>  |                              |                                 |                                  |
| <b>Steatosis</b>                  |                              |                                 |                                  |
| <5%                               | 27 (87.1)                    | -                               | 31 (100) <sup>c</sup>            |
| 5-33%                             | 3 (9.7)                      | 3 (9.7) <sup>a</sup>            | -                                |
| 34-66%                            | 1 (3.2)                      | 15 (48.4)                       | -                                |
| >66%                              | -                            | 13 (41.9)                       | -                                |
| <b>Lobular inflammation</b>       |                              |                                 |                                  |
| No foci                           | 12 (38.7)                    | -                               | 24 (77.4) <sup>b, c</sup>        |
| <2 foci                           | 16 (51.6)                    | 5 (16.1) <sup>a</sup>           | 7 (22.6)                         |
| 2-4 foci                          | 3 (9.7)                      | 21 (67.7)                       | -                                |
| >4 foci                           | -                            | 5 (16.1)                        | -                                |
| <b>Hepatocellular Ballooning</b>  |                              |                                 |                                  |
| None                              | 26 (83.8)                    | 2 (6.5) <sup>a</sup>            | 31 (100) <sup>b, c</sup>         |
| Few cells                         | 5 (16.1)                     | 20 (64.5)                       | -                                |
| Many cells                        | -                            | 9 (29.0)                        | -                                |
| <b>Fibrosis</b>                   |                              |                                 |                                  |
| None (F0)                         | 8 (25.8)                     | 4 (12.9)                        | 17 (54.8) <sup>b, c</sup>        |
| Perisinusoidal or periportal (F1) | 18 (58.1)                    | 8 (25.8)                        | 13 (41.9)                        |
| Perisinusoidal and portal (F2)    | 5 (16.1)                     | 15 (48.4)                       | 1 (3.3) <sup>b, c</sup>          |
| Bridging fibrosis (F3)            | -                            | 4 (12.9)                        | -                                |

Values were expressed as number of cases and percentages or medians and interquartile range. ACEIs: Angiotensin-converting-enzyme inhibitor; ALT: Alanine transaminase; AST: Aspartate transaminase; ARA-II: Angiotensin II receptor antagonists; BMI: Body mass index; CRP: C-reactive

protein; HDL: High-density lipoprotein; HOMA-IR: Homeostatic model assessment of insulin resistance; HTG: Hypertriglyceridemia; LDL: Low-density lipoprotein; T2DM: Type 2 diabetes mellitus. Significant differences in comparisons are indicated by <sup>a</sup>non-NASH vs. NASH, <sup>b</sup>Non-NASH vs 12 months after surgery. <sup>c</sup>NASH vs one-year after surgery (at least  $p < 0.05$ ) by Wilcoxon rank-sum test.

**Supplementary Table S2.** Quantitative targeted metabolome in livers with, without NASH and 1 year after surgery from patients with severe obesity

|                   | Metabolite               | Non-NASH<br>(n=31)       | NASH<br>(n=31)                        | One-year after surgery<br>(n=31)         |
|-------------------|--------------------------|--------------------------|---------------------------------------|------------------------------------------|
| Energy Metabolism | $\alpha$ -ketoglutarate  | 3.5 (2.9 – 4.1)          | 4.4 (3.4 – 5.1) <sup>a</sup>          | 0.4 (0.3 – 0.6) <sup>b, c</sup>          |
|                   | $\beta$ -hydroxybutyrate | 198.3 (150.5 – 247.9)    | 170.2 (129.7 – 208.8)                 | 22.5 (20.2 – 27.8) <sup>b, c</sup>       |
|                   | Aconitate                | 5.9 (4.3 – 7.5)          | 5.9 (4.5 – 6.5)                       | 1.4 (1.0-2.2) <sup>b, c</sup>            |
|                   | Alanine                  | 631.7 (545.0 – 692.0)    | 675.5 (579.3- 727.8)                  | 312.8 (179.8 – 553.0) <sup>b, c</sup>    |
|                   | Aspartate                | 110.8 (73.2 – 128.2)     | 119.0 (84.9 – 154.7)                  | 29.2 (23.0 – 36.4) <sup>b, c</sup>       |
|                   | (Iso)Citrate             | 0.12 (0.07 – 0.16)       | 0.17 (0.11 – 0.31) <sup>a</sup>       | 0.84 (0.6 – 1.2) <sup>b, c</sup>         |
|                   | Fructose-1,6BP           | 9.0 (7.5 – 10.2)         | 10.1 (8.5 – 10.8)                     | 5.7 (3.5 – 7.5) <sup>b, c</sup>          |
|                   | Fructose-6P              | 15.8 (13.3 – 16.6)       | 18.1 (15.4 – 19.7) <sup>a</sup>       | 8.9 (5.7-14.3) <sup>b, c</sup>           |
|                   | Fumarate                 | 20.8 (16.3 – 28.6)       | 21.0 (16.4 – 26.2)                    | 8.4 (4.7 – 10.7) <sup>b, c</sup>         |
|                   | Glucose                  | 118.4 (75.6 – 144.8)     | 103.7 (81.5 – 103.7)                  | 73.6 (37.0 – 90.9) <sup>b, c</sup>       |
|                   | Gluconate-6P             | 9.8 (7.0 – 12.5)         | 7.7 (5.2 – 9.2) <sup>a</sup>          | ND                                       |
|                   | Glucose-6P               | 13.7 (11.4 – 15.7)       | 15.3 (12.9 – 16.5)                    | 25.3 (14.8 – 30.4) <sup>b, c</sup>       |
|                   | Glutamate                | 361.8 (242.2 – 481.8)    | 493.7 (351.7 – 586.7)                 | 528.1 (359.8 – 761.7) <sup>b</sup>       |
|                   | Glutamine                | 2212.1 (1818.1 – 2628.4) | 2524.5 (1796.4 – 3249.6) <sup>a</sup> | 2110.6 (1478.9 – 5212.7) <sup>b, c</sup> |
|                   | Glyceraldehyde-3P        | 8.3 (5.5 – 10.5)         | 7.2 (5.9 – 8.7)                       | ND                                       |
|                   | Glycerate-3P             | 33.5 (30.2 – 47.3)       | 38.4 (31.6 – 54.3)                    | 21.1 (18.5 – 21.8) <sup>b, c</sup>       |
|                   | Isoleucine               | 209.1 (123.0 – 265.8)    | 208.4 (179.0 – 242.0)                 | 12.1 (8.9 – 26.8) <sup>b, c</sup>        |
|                   | Lactate                  | 1057.0 (956.5 – 1380.7)  | 1085.9 (983.5 – 1212.6)               | 1121.2 (499.6 – 1833.9)                  |
|                   | Leucine                  | 383.3 (245.9 – 503.2)    | 372.7 (301.1 – 441.6)                 | 37.6 (30.3 – 68.7) <sup>b, c</sup>       |
|                   | Malate                   | 42.5 (35.1 – 51.3)       | 44.6 (34.1 – 58.5)                    | 43.1 (27.0 – 56.0)                       |
|                   | Oxalacetate              | 2.3 (1.5-3.9)            | 2.8 (1.4-4.6)                         | ND                                       |
|                   | Phosphoenolpyruvate      | 10.1 (7.5 – 15.8)        | 11.0 (8.7 – 13.7)                     | 2.2 (0.6 – 2.8) <sup>b, c</sup>          |
|                   | Pyruvate                 | 7.5 (6.0 – 8.9)          | 10.8 (6.5 – 16.5) <sup>a</sup>        | 15.0 (6.6 – 21.0) <sup>b, c</sup>        |
|                   | Ribose-5P                | 12.7 (9.8 – 16.3)        | 12.3 (11.6 – 12.4)                    | 34.2 (23.2 – 46.4) <sup>b, c</sup>       |
|                   | Serine                   | 556.1 (338.2 – 748.9)    | 625.2 (538.4 – 800.2)                 | 267.2 (155.8 – 379.0) <sup>b, c</sup>    |
|                   | Succinate                | 25.2 (19.9 – 32.3)       | 25.4 (20.6 – 31.2)                    | 62. (34.5 – 95.0) <sup>b, c</sup>        |
|                   | Valine                   | 274.3 (157.2 – 364.1)    | 254.1 (182.9 – 313.6)                 | 34.0 (20.4 – 61.1) <sup>b, c</sup>       |
| 1-C Metabolism    | 5-mTHF                   | 6.9 (5.3 – 12.9)         | 6.0 (3.1 – 9.0)                       | ND                                       |
|                   | AMP                      | 20.0 (9.9 – 35.1)        | 18.7 (10.9 – 27.5)                    | 11.2 (4.9 – 13.7) <sup>b, c</sup>        |
|                   | Betaine                  | 26.8.8 (17.1 – 35.7)     | 31.1 (17.9 – 32.4)                    | 21.3 (12.6 – 25.9) <sup>b, c</sup>       |
|                   | Choline                  | 117.5 (92.7 – 148.6)     | 122.7 (105.2 – 132.7)                 | 116.3 (54.3 – 171.3)                     |
|                   | Cystathionine            | 0.81 (0.59 – 1.12)       | 0.94 (0.72 – 1.17)                    | 0.14 (0.08 – 0.19) <sup>b, c</sup>       |
|                   | Cysteine                 | 2780.6 (1644.2 – 4776.9) | 2528.9 (420.8 – 3746.7)               | ND                                       |
|                   | Dimethylglycine          | 120.8 (88.9 – 146.7)     | 138.7 (112.6 – 171.5)                 | 87.2 (43.6 – 122.0) <sup>b, c</sup>      |
|                   | dUMP                     | 0.15 (0.11 – 0.21)       | 0.13 (0.10 – 0.18)                    | ND                                       |
|                   | Folic acid               | 0.012 (0.007 - 0.017)    | 0.010 (0.005 - 0.014)                 | ND                                       |
|                   | Formyl-THF               | 0.019 (0.012 - 0.027)    | 0.015 (0.011 - 0.017)                 | ND                                       |
|                   | Glycine                  | 481.0 (83.3 – 817.4)     | 154.4 (79.7 – 251.2) <sup>a</sup>     | ND                                       |
|                   | Homocysteine             | 100.7 (66.3 – 180.8)     | 136.6 (68.9 – 307.4)                  | 24.2 (12.2 – 45.6) <sup>b, c</sup>       |
|                   | Methionine               | 36.2 (24.6 – 67.1)       | 28.7 (19.9 – 33.3) <sup>a</sup>       | 7.23 (4.9 – 10.7) <sup>b, c</sup>        |
|                   | NADPH                    | 25.8 (17.9 – 32.8)       | 21.3 (14.1 – 26.3) <sup>a</sup>       | 7.2 (4.9 – 8.2) <sup>b, c</sup>          |
|                   | Pyridoxal-5-P            | 0.21 (0.14 – 0.28)       | 0.25 (0.15 – 0.38)                    | 0.18 (0.14 – 0.28)                       |
|                   | Riboflavin               | 0.34 (0.22 – 0.53)       | 0.33 (0.25 – 0.41)                    | 0.22 (0.13 – 0.34) <sup>b, c</sup>       |
|                   | SAH                      | 12.7 (10.7 – 15.0)       | 9.0 (7.6 – 10.5) <sup>a</sup>         | 2.9 (1.6 – 3.7) <sup>b, c</sup>          |
|                   | SAM                      | 4.6 (2.9 – 5.5)          | 5.0 (3.8 – 6.9)                       | 1.5 (0.8 – 2.7) <sup>b, c</sup>          |
|                   | Taurine                  | 9.3 (7.1 – 11.9)         | 12.8 (9.6 – 13.6) <sup>a</sup>        | 9.7 (5.1 – 16.3)                         |

Data are shown as median (interquartile range) in nmol/g of tissue (dry weight). AMP, Adenosine 5'-monophosphate; dUMP, Deoxyuridine monophosphate; SAH, S-adenosylhomocysteine; SAM, S-adenosylmethionine; THF, Tetrahydrofolate. Significant differences in comparisons are indicated by <sup>a</sup>non-NASH vs. NASH, <sup>b</sup>Non-NASH vs 12 months after surgery. <sup>c</sup>NASH vs one-year after surgery (at least  $p < 0.05$ ) by Wilcoxon rank-sum test.



**Supplementary Table S3.** The effect of supplementation with cell-permeable  $\alpha$ KG analog (DMKG) in cultured cells

|                   | Metabolite               | Untreated<br>(n=6)     | 2 Mm DMKG<br>(n=6)    | p-value      |
|-------------------|--------------------------|------------------------|-----------------------|--------------|
| Energy Metabolism | $\alpha$ -ketoglutarate  | 0.02 (0.02 – 0.04)     | 0.20 (0.13 – 0.31)    | <b>0.002</b> |
|                   | $\beta$ -hydroxybutyrate | 0.27 (0.19 – 0.36)     | 0.33 (0.27 – 0.52)    | 0.240        |
|                   | Alanine                  | 1.1 (0.89 – 1.5)       | 4.44 (3.36 – 7.66)    | <b>0.002</b> |
|                   | Aspartate                | 1.78 (1.27 – 5.14)     | 8.6 (5.73 – 14.45)    | <b>0.026</b> |
|                   | (Iso)Citrate             | 0.16 (0.14 – 0.23)     | 0.29 (0.24 – 0.44)    | <b>0.041</b> |
|                   | Fructose-1,6BP           | 0.91 (0.67 – 1.45)     | 1.51 (0.85 – 2.5)     | 0.240        |
|                   | Fructose-6P              | 5.7 (3.58 – 7.51)      | 8.2 (5.0 – 11.9)      | 0.240        |
|                   | Fumarate                 | 0.13 (0.10 – 0.19)     | 0.6 (0.4 – 0.9)       | <b>0.002</b> |
|                   | Glucose                  | 10.3 (7.7 – 16.7)      | 8.6 (6.2 – 10.6)      | 0.310        |
|                   | Gluconate-6P             | 0.23 (0.21 – 0.36)     | 0.34 (0.24 – 0.41)    | 0.485        |
|                   | Glucose-6P               | 1.7 (1.1 – 2.6)        | 2.6 (1.4 – 4.2)       | 0.240        |
|                   | Glutamate                | 3.0 (0.8 – 6.4)        | 23.9 (16.9 – 38.9)    | <b>0.002</b> |
|                   | Glycerate-3P             | 1.9 (1.1 – 3.0)        | 4.0 (2.2 – 6.7)       | 0.065        |
|                   | Isoleucine               | 1.5 (1.3 – 2.6)        | 1.6 (1.6 – 1.6)       | 0.485        |
|                   | Lactate                  | 29.5 (24.2 – 36.2)     | 32.6 (24.2 – 40.9)    | 0.818        |
|                   | Leucine                  | 3.7 (3.2 – 4.9)        | 4.5 (3.3 – 5.2)       | 0.699        |
|                   | Malate                   | 0.28 (0.25 – 0.38)     | 1.15 (0.86 – 1.97)    | <b>0.002</b> |
|                   | Oxaloacetate             | 0.8 (0.6 – 1.2)        | 1.7 (1.0 – 2.3)       | <b>0.041</b> |
|                   | Phosphoenolpyruvate      | 0.19 (0.08 – 0.42)     | 0.36 (0.24 – 0.81)    | 0.240        |
|                   | Pyruvate                 | 0.14 (0.11 – 0.22)     | 0.28 (0.22 – 0.34)    | <b>0.041</b> |
|                   | Ribose-5P                | 0.26 (0.14 – 0.39)     | 0.40 (0.3 – 0.5)      | 0.132        |
|                   | Serine                   | 2.0 (1.0 – 3.1)        | 8.1 (5.3 – 11.7)      | <b>0.004</b> |
|                   | Succinate                | 4.6 (4.5 – 5.6)        | 5.4 (4.2 – 7.5)       | 0.485        |
|                   | Valine                   | 4.5 (3.8 – 5.3)        | 4.8 (3.6 – 6.0)       | 0.818        |
| 1-C Metabolism    | AMP                      | 0.54 (0.11 – 0.67)     | 0.07 (0.05 – 0.12)    | <b>0.004</b> |
|                   | Betaine*                 | 0.008 (0.005 – 0.010)  | 0.003 (0.002 – 0.005) | <b>0.026</b> |
|                   | Choline-Dimethylglycine  | 0.05 (0.03 – 0.08)     | 0.02 (0.01 – 0.03)    | <b>0.015</b> |
|                   | Cystathionine*           | 1.9 (1.8 – 3.5)        | 1.8 (1.5 – 1.8)       | <b>0.015</b> |
|                   | Cysteine                 | 783.3 (579.1 – 1141.8) | 651.6 (635.6 – 704.3) | 0.485        |
|                   | Folic acid*              | 0.42 (0.29 – 0.54)     | 0.24 (0.20 – 0.40)    | 0.180        |
|                   | Formyl-THF*              | 0.28 (0.24 – 0.64)     | 0.26 (0.11 – 0.63)    | 0.589        |
|                   | Glycine                  | 7.1 (5.3 – 7.5)        | 5.7 (4.8 – 7.9)       | 0.699        |
|                   | Homocysteine             | 0.011 (0.008 – 0.014)  | 0.007 (0.004 – 0.009) | <b>0.041</b> |
|                   | Methyl-THF*              | 0.50 (0.30 – 0.096)    | 0.33 (0.22 – 0.35)    | 0.093        |
|                   | Methylcobalamine *       | 0.11 (0.06 – 0.23)     | 0.17 (0.15 – 0.20)    | 0.485        |
|                   | Methionine               | 0.036 (0.025 – 0.076)  | 0.038 (0.026 – 0.068) | 0.485        |
|                   | NADPH                    | 0.11 (0.08 – 0.12)     | 0.05 (0.03 – 0.06)    | <b>0.015</b> |
|                   | Pyridoxal 5-P *          | 3.5 (3.2 – 4.9)        | 2.9 (2.2 – 4.6)       | 0.240        |
|                   | Riboflavin *             | 0.35 (0.34 – 0.75)     | 0.6 (0.4 – 0.6)       | 0.589        |
|                   | SAH*                     | 0.010 (0.006 – 0.023)  | 0.008 (0.004 – 0.009) | <b>0.009</b> |
|                   | SAM                      | 0.071 (0.065 – 0.080)  | 0.058 (0.048 – 0.065) | <b>0.041</b> |

Data are shown as median (interquartile range) in nmol/mg of protein except those marked with an asterisk denoting pmol/mg of protein. AMP, adenosyl monophosphate; NADPH, Nicotinamide adenine dinucleotide phosphate; SAH, S-adenosylhomocysteine; SAM, S-adenosylmethionine; THF, Tetrahydrofolate.

**Supplementary Table S4.** Gene expression profile in NASH livers with genes listed alphabetically according to up- and down-regulation, as compared with non- NASH livers

### Upregulated

ACPS, ADCYAP1R1, AJUBA, APOL3, B3GNT5, BBC3, BHLHA15, BTG2, C12orf5, C15orf48, C2orf82, CSAR1, CAPG, CCDC109B, CCL2, CCL20, CCL3, CC, CD209, CD3G, CD52, CD83, CDCA2, CDH15, CDHR2, CFTR, CH25H, CLDN11, CLDN5, CLECL1, COL1A1, COL1A2, COL4A2-AS1, CPXM2, CPZ, CRTAM, CTSV, CXCL10, CXCL3, CXCL8, CXCL9, DOK5, DOK6, EDN2, EEF1A2, EGR2, EGR3, EZR-AS1, FABP4, FABP5, FAM151A, FAM90A7P, FAR2, FFAR3, FMO1, FNDC5, FOXL2, FPR2, GATA3, GEM, GLIPR1, GPNMB, GPR182, GPR183, HIST1H1B, HIST1H3B, HLA-DQA1, HLA-DRB5, HMGCS1, HSPB8, HULC, IGSF22, IL10RB-AS1, IL1B, IL4I1, INHBE, ISM1, KCNJ3, LAMP3, LINC00884, LINC00885, LOC154872, LPL, LYPD1, MB, MB21D2, MCM2, MMP9, MNDA, NANOS3, NFKBIE, NR4A3, NTN3, OSM, PADI1, PCDH9-AS2, PEG10, PLA2G7, PLAUR, PLCXD2, PLXNC1, PODN, PRAMEF10, PROK2, PSRC1, QPCT, RASSF9, RFTN1, RGS16, RGS2, RNF186, RRAD, SEC14L3, SIX1, SLC22A13, SMIM24, SORT1, SPPI, SQLE, STMN2, TACC3, TBXAS1, THBS2, THEMIS, THY1, TIFAB, TLR9, TM4SF19, TMEM200A, TNFAIP3, TNFSF9, TREM2, TRHDE-AS1, TRIM59, TRIM63, TYMS, UGT3A2, UHRF1, UNC93A, WNT2, WNT5A, ZNF620, ZNF683

### Downregulated

AASS, ABCA10, ACKR2, ACOT6, ADAM1A, ADCY1, ADCY10, ADHFE1, ADTRP, AFF3, AFG3L1P, AGR2, AKR1C6P, ALPK2, ANKRD23, ANO8, ARHGEF26, ARHGEF4, C1orf228, C1QTNF3, CA3, CA9, CAPN3, CATSPER3, CCDC158, CCDC162P, CCDC180, CCDC38, CCDC84, CELSR3, CENPJ, CFAP70, CHAD, CHKB, CHRD, CIART, CIT, CLASRP, CLCN2, CMYA5, COLCA2, CPT1B, CRYGS, CSPP1, CXCL2, CYP1A1, CYP3A4, CYP3A43, CYP3A5, CYP3A7, CYP4Z1, DCDC5, DCPS, DDX43, DFNBS9, DGCR14, DKFZp434J0226, EFCAB1, ENO1-AS1, ERN1, FAM132A, FAM193B, FAM76B, FAM83A-AS1, FKBP5, FLJ21408, FLJ31104, FOXO1, FUT3, GADD45G, GNMT, GNRH1, GOLGA7B, GPR128, GPT2, GSTA7P, HAL, HERC2P2, HERC2P7, HERC5, HIGD1B, HORMAD2, HSD17B3, HSD3B1, ICA1, IFRD1, IGF1, IGFBP2, INS-IGF2, IRX3, ITGA10, KCNMB3, KGFLP1, KIAA0895L, KPNA7, KRT42P, KRT71, L3MBTL1, LCE2D, LGI4, LGSN, LHX4-AS1, LINC00238, LINC00659, LINC00939, LINC01125, LOC100270804, LOC100289230, LOC100505918, LOC285626, LOC644656, LOC729603, LRRC73, LYG1, MAST2, MEGF6, MREG, MT1IP, MTHFD2L, MTUS2, MYO15A, MYOM1, NBPFI4, NEAT1, NEIL1, NINJ2, NNMT, NOXO1, NRBP2, OAT, P4HA1, PAPD7, PAQR6, PARP6, PATL2, PDZD3, PILRA, PILRB, POFUT2, POU6F1, PPARGC1A, PRR26, PRSS50, PSPH, PTPRH, PYROXD2, PZP, RAD51AP2, RDH12, REC8, RFPL4AL1, RHBG, RIC3, S100A1, SEC16B, SH2B1, SH2D6, SLC10A5, SLC16A1, SLC23A2, SLC25A18, SLC29A2, SLC34A1, SMIM5, SNORA33, SNORA41, SNORA6, SNORA70B, SNORA70C, SNORA70E, SNORD18C, SNORD98, SOCS2, S1R3, TAS2R19, TBC1D3B, TBC1D3C, TCAF2, TCERG1, TDRD6, TFRC, TG, TMC06, TPTE2P5, TRPV1, TSKU, TSNAXIP1, UBE2Q2L, UCN, UGT2A1, VCPKMT, WDR60, ZDHHC11, ZNF211, ZNF266, ZNF276, ZNF507, ZNF833P

### Gene ontology analysis

0

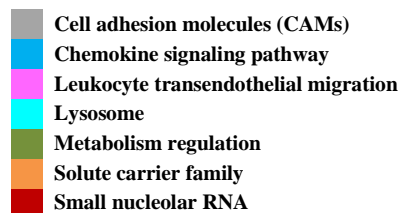

**Supplementary Table S5.** Gene expression data in NASH livers with up- and down-regulation, as compared with non-NASH patients.

| Upregulated genes |                |             |           |                |            | Downregulated genes |                |             |              |                |             |
|-------------------|----------------|-------------|-----------|----------------|------------|---------------------|----------------|-------------|--------------|----------------|-------------|
| GeneName          | log2FoldChange | p_value     | GeneName  | log2FoldChange | p_value    | GeneName            | log2FoldChange | p_value     | GeneName     | log2FoldChange | p_value     |
| LINC00885         | 1.108266051    | 0.002829371 | CAPG      | 1.3101614      | 0.00197551 | WDR60               | -1.126493661   | 0.001774784 | PTPRH        | -1.11299621    | 0.001893405 |
| TNFSF9            | 1.605596145    | 0.001640699 | LAMP3     | 1.03442289     | 0.01288156 | GADD45G             | -1.947612699   | 0.005103815 | CA9          | -1.14424059    | 0.026604041 |
| RNF186            | 1.536754651    | 0.047277861 | FMO1      | 1.88537491     | 0.00909886 | IGFBP2              | -2.142189864   | 0.004480224 | PRR26        | -1.16557451    | 0.014913984 |
| IL10R8-AS1        | 1.135618936    | 0.007232591 | GEM       | 1.21676185     | 0.01258329 | CRYGS               | -1.368207074   | 0.036290713 | KPNA7        | -1.14681521    | 2.33E-05    |
| BHLHA15           | 1.119858021    | 0.01377422  | CXCL9     | 1.03320944     | 0.00727778 | PILRA               | -1.323211487   | 0.016119236 | NOXO1        | -1.44398216    | 0.000494939 |
| ZNF683            | 1.161298268    | 0.012713694 | FAR2      | 1.09681995     | 0.01731577 | CHAD                | -1.079216635   | 0.008185086 | EFCAB1       | -1.24525592    | 0.003888249 |
| FPR2              | 1.445569009    | 0.008564473 | MMP9      | 1.47015816     | 0.000163   | ARHGEF4             | -1.491995251   | 0.004623492 | LOC100289230 | -1.31613538    | 0.024469741 |
| HIST1H1B          | 1.251730534    | 0.040270009 | PLA2G7    | 1.43160207     | 0.00188927 | DKFZp434J0226       | -1.217881339   | 0.047275558 | PAPD7        | -1.13453724    | 0.025046828 |
| FOXL2             | 1.145449548    | 0.04465113  | RGS16     | 1.45828142     | 0.03771505 | CYP3A5              | -2.00176286    | 0.007499079 | TCERG1       | -1.05862387    | 0.003162446 |
| SEC14L3           | 1.207605709    | 0.00068581  | LYPD1     | 1.08815201     | 0.02034367 | SEC16B              | -1.060531976   | 0.003476521 | NNMT         | -1.4945219     | 0.004529442 |
| IGSF22            | 1.494253964    | 0.027197341 | CDH15     | 1.39545464     | 0.03108971 | ACOT6               | -1.054823819   | 0.009864916 | CHRM4        | -1.79152394    | 0.027862136 |
| STMN2             | 2.188089325    | 0.00933607  | CCNB2     | 1.06475296     | 0.04162568 | CLCN2               | -1.28755502    | 0.005320675 | ADTRP        | -1.01343989    | 0.00129832  |
| GPR183            | 1.271443475    | 0.000440736 | EEF1A2    | 1.89120342     | 0.00648014 | KRT71               | -1.340791372   | 0.002811005 | LGSN         | -1.0940202     | 0.002486112 |
| CCL2              | 1.634426073    | 0.043998403 | FCAMR     | 1.54339159     | 0.0042068  | FAM193B             | -1.101393915   | 0.013508543 | TCAF2        | -1.18049058    | 0.035311117 |
| RG52              | 1.048396224    | 0.006946685 | IL1B      | 1.94459522     | 0.0027467  | GPT2                | -1.273625123   | 0.00983449  | FAM76B       | -1.32957049    | 0.011563721 |
| EDN2              | 1.4333565      | 0.015961887 | FAM151A   | 1.44265347     | 0.02711086 | IGF1                | -1.110791211   | 0.006389929 | TBC1D3B      | -1.7122397     | 0.035138425 |
| SPP1              | 1.214260744    | 0.028256747 | GPNMB     | 1.1812359      | 0.02641774 | CYP3A7              | -1.943510904   | 6.42E-05    | PILRB        | -1.71640567    | 0.04625982  |
| NR4A3             | 1.375631513    | 0.032454529 | IL4I1     | 1.11818242     | 0.00628265 | CIT                 | -1.240458536   | 0.001098771 | LOC100270804 | -1.47292168    | 0.001714085 |
| FABP5             | 1.497196087    | 0.001625692 | ADCVAP1R  | 1.02506482     | 0.02922941 | LYG1                | -1.586894371   | 0.023798416 | AGR2         | -1.7968788     | 0.037994226 |
| HIST1H3B          | 1.206176166    | 0.002622831 | MB21D2    | 1.07487352     | 0.02649904 | HERC2P7             | -1.174357522   | 0.029563533 | NRBP2        | -1.03141893    | 0.006090631 |
| CLEC11            | 1.238343858    | 0.045466451 | NTN3      | 1.00953129     | 0.01187354 | VPCKMT              | -1.010084293   | 0.005192634 | CCDC180      | -1.61698831    | 0.024718146 |
| COL1A2            | 1.140998788    | 0.001725005 | EGR3      | 1.73474765     | 0.03692354 | CATSPER3            | -1.181362929   | 0.005549189 | SLC23A2      | -1.01411492    | 0.041434011 |
| CPZ               | 1.057332488    | 0.037351842 | UNC93A    | 1.09911426     | 0.01985908 | UCN                 | -1.042298411   | 0.049830757 | SLC34A1      | -1.34181598    | 0.016120516 |
| OSM               | 1.57816567     | 0.000431245 | BTG2      | 1.13793159     | 0.01114981 | CCDC162P            | -1.361185035   | 0.000454615 | SLMIS5       | -1.0234794     | 0.02913347  |
| CCL3              | 1.114250666    | 0.024238018 | CDC42     | 1.00829354     | 0.02227709 | LRRC73              | -1.328380079   | 0.009472993 | TRPV1        | -1.38803877    | 0.030937051 |
| WNT2              | 1.12925558     | 0.046624632 | PQCT      | 1.15605831     | 0.00822221 | LOC100505918        | -1.618054831   | 0.000383718 | AFB3         | -1.1349031     | 0.013133814 |
| GATA3             | 1.225255948    | 0.007728114 | A1UBA     | 1.12998723     | 0.04753186 | ZDHHC11             | -1.470278778   | 0.003716059 | PAQR6        | -1.23357586    | 0.034895557 |
| PADI1             | 3.066689154    | 0.002092239 | EZR-AS1   | 1.4482999      | 0.0317027  | KRT42P              | -1.569628795   | 0.019052349 | CSP1         | -1.03610211    | 0.008362508 |
| CLDN5             | 1.021312659    | 0.033108993 | COL1A1    | 1.21886276     | 0.00267172 | S100A1              | -1.02918135    | 0.005872988 | ZNF266       | -1.02918135    | 0.003050812 |
| SIX1              | 1.240592269    | 0.014864258 | APOL3     | 1.0782398      | 0.00497664 | RIC3                | -1.39931336    | 0.001679276 | TDRD6        | -1.48727688    | 0.039793123 |
| THEMIS            | 1.500995323    | 0.000895744 | PSRC1     | 1.06741263     | 0.04120535 | DFNB59              | -1.609085539   | 0.001677429 | PRSS50       | -1.47990009    | 0.011927551 |
| HSPB8             | 1.177115944    | 0.018070953 | RASSF9    | 1.08026457     | 0.03333617 | LINC006059          | -1.194626299   | 0.00017105  | CXCL2        | -1.39777064    | 0.023398815 |
| LPL               | 2.481562055    | 0.001204697 | ACP5      | 1.01397551     | 0.02173683 | UBE2Q2L             | -1.084857159   | 0.03221555  | SH2B1        | -1.00707108    | 0.010187832 |
| CXCL3             | 1.586512193    | 0.046317488 | FAM90A7P  | 1.43185238     | 0.00309275 | ADCY1               | -1.03533066    | 0.009044822 | CMYA5        | -1.88961881    | 0.04205976  |
| TRHDE-AS1         | 1.432880463    | 0.001455994 | PODN      | 1.39243877     | 0.01026783 | TSNAXIP1            | -1.244770891   | 0.007667743 | P4HA1        | -1.72685563    | 0.000608092 |
| CCL20             | 1.619974764    | 0.033642148 | TRIM59    | 1.0333655      | 0.00549998 | NEAT1               | -2.100398711   | 0.02309016  | HSD17B3      | -1.26045501    | 0.049483051 |
| LINC00884         | 1.008899566    | 0.030495083 | CDHR2     | 1.25087376     | 0.00502943 | SNORA72             | -1.274518492   | 0.022261622 | FLJ21408     | -1.70077327    | 0.025790691 |
| DOK5              | 1.321334784    | 0.031174145 | MB        | 1.84380994     | 0.00665582 | FKBP5               | -1.425452975   | 0.047662255 | RPL14A1      | -1.18552897    | 0.046163437 |
| CLDN11            | 1.016858101    | 0.011762836 | SMIM24    | 2.30737049     | 0.01916011 | ZNF211              | -1.251199378   | 0.016830068 | CIART        | -1.15097359    | 0.047524274 |
| C13G3             | 1.084529628    | 0.023614364 | TLR9      | 1.10858318     | 0.02735103 | GOLGA7B             | -1.17791694    | 0.028403328 | LINC01125    | -1.44058468    | 0.034571851 |
| MNDA              | 1.034074048    | 0.016435588 | INHBE     | 1.13739729     | 0.01880832 | CCDC84              | -1.15751599    | 0.018016694 | SOC2         | -1.71615046    | 0.000992992 |
| UHRF1             | 1.314983104    | 0.002832784 | COL4A2-AS | 1.25129413     | 0.0020565  | GNRH1               | -1.007087074   | 0.021117891 | FAM132A      | -1.16590025    | 0.029318286 |
| CD52              | 1.399552461    | 1.89E-05    | B3GNT5    | 1.2871771      | 0.01160255 | ADHFE1              | -1.129910177   | 8.13E-05    | KCNMB3       | -1.33571172    | 0.032448127 |
| HLA-DQA1          | 1.746762449    | 0.042459273 | BBC3      | 1.07223164     | 0.00516045 | TAS1R3              | -1.204752139   | 0.026546907 | LPC644656    | -1.25457553    | 0.036935149 |
| LOC154872         | 1.313600864    | 0.005456459 | PRAMEF10  | 2.04642563     | 0.00228353 | LINC00238           | -1.352417355   | 0.00026214  | PARP6        | -1.00612529    | 0.038261869 |
| CTSV              | 1.16256244     | 0.002183877 | TM4SF19   | 1.28956999     | 0.00844104 | TG                  | -1.362292804   | 0.001616555 | ERN1         | -1.15768826    | 0.025821033 |
| HMGCS1            | 1.130091553    | 0.001204527 | CD84      | 1.70461926     | 0.0085099  | UGT2A1              | -1.655474606   | 0.047696138 | TAS2R19      | -1.51169392    | 0.040660052 |
| NANOS3            | 1.252378255    | 0.000139541 | PLXNC1    | 1.31395716     | 0.01916546 | SLC29A2             | -1.006325302   | 0.003901491 | HERC5        | -1.00498747    | 0.000740968 |
| GLIPR1            | 1.036426354    | 0.010689844 | FFAR3     | 1.5142551      | 0.00897662 | CCDC158             | -1.456799089   | 0.020690154 | FLJ31104     | -1.17486704    | 0.007729886 |
| THBS2             | 1.032338806    | 0.003884525 | WNT5A     | 1.07413561     | 0.01199596 | CPT1B               | -1.670810078   | 0.0436173   | DCPS         | -1.26871742    | 0.019435557 |
| FNDG5             | 1.406618425    | 0.019345272 | CCDC109B  | 1.13499969     | 0.0048924  | AKR1C6P             | -1.280129373   | 0.014501026 | LINC00939    | -1.55396497    | 0.041503613 |
| TIFAB             | 1.523492563    | 0.008097768 | PEDG10    | 2.48542661     | 0.0069961  | MAST2               | -1.125526239   | 0.016840142 | DCDC5        | -1.77184403    | 0.004577131 |
| C2orf82           | 1.170991787    | 0.001451408 | PLAUR     | 1.5661879      | 0.001565   | GSTA7P              | -1.714817218   | 2.46E-05    | HSD3B1       | -1.14440667    | 0.014152964 |
| SORT1             | 2.023260495    | 0.015972087 | PLCXD2    | 1.34094042     | 0.02312495 | HLXA-AS1            | -1.371608943   | 0.032521631 | PYROXD2      | -1.0742378     | 0.015932891 |
| UGT3A2            | 1.511531069    | 0.013210421 | CSAR1     | 1.10317628     | 0.00668617 | FUT3                | -1.86470039    | 0.013011228 | SNORA6       | -1.61078428    | 0.046323089 |
| TREM2             | 1.797670785    | 0.01811032  | TMEM200A  | 1.32201858     | 0.02980755 | LOC285626           | -1.486953604   | 0.002049649 | HORMAD2      | -1.43334661    | 0.001193126 |
| PCDH9-AS2         | 1.410756403    | 0.008774583 | CHZ5H     | 2.04101774     | 0.03073191 | GPR128              | -1.354022024   | 0.007686289 | DGCR14       | -1.03707075    | 0.025475074 |
| ZNF620            | 1.165969722    | 0.029665648 | TACC3     | 1.00456396     | 0.04173554 | CYP3A4              | -1.242529448   | 0.005431129 | FOXO1        | -1.02089662    | 0.002522249 |
| DOK6              | 1.218014335    | 0.010800831 | CPXM2     | 1.35337425     | 0.02324825 | 13MBTL1             | -1.004317846   | 0.047856923 | TBC1D3C      | -2.03687695    | 0.015344298 |
| HULC              | 1.79534532     | 0.002855902 | TRIM63    | 1.66128199     | 0.01149581 | CCDC38              | -1.51983207    | 0.027374977 | RAD51AP2     | -1.00284032    | 0.043864866 |
| C15orf48          | 1.132506601    | 0.02259033  | MCME2     | 1.08313647     | 0.0026957  | POFUT2              | -1.073197128   | 0.018255897 | TMCO6        | -1.26949896    | 0.00020521  |
| CRTAM             | 1.260530476    | 0.006714449 | NFKBIE    | 1.04460348     | 0.01842665 | SNORA70B            | -1.078813343   | 0.04286567  | COLCA2       | -1.05685019    | 0.020575812 |
| TBXAS1            | 1.081249356    | 0.004787028 | KCNJ3     | 1.05333376     | 0.00124271 | CFAP70              | -1.556497279   | 0.007343097 | IFRD1        | -1.06333905    | 0.019435381 |
| TNFAIP3           | 1.021597255    | 0.001563517 | CXCL8     | 2.16064077     | 0.01780121 | PZP                 | -1.537947401   | 0.021468382 | SNORD98      | -1.08777867    | 0.027374871 |
| CXCL10            | 1.58142216     | 0.024026638 | TYMS      | 1.15534198     | 0.02740358 | MREG                | -1.199152475   | 0.01863969  | HIGD1B       | -1.00103968    | 0.025156285 |
| PROK2             | 1.651176691    | 0.008410417 | THY1      | 1.37206997     | 1.32E-05   | NBPFL14             | -1.335820315   | 0.022385849 | CHKB         | -1.04593312    | 0.037667327 |
| CD209             | 1.350897487    | 0.043565974 | SQLE      | 1.6043644      | 0.00024769 | ANKRD23             | -1.040173325   | 0.00755223  | MYO15A       | -1.82349261    | 0.00942321  |
| FABP4             | 1.348746264    | 0.004523325 | RRAD      | 1.51770217     | 0.02817935 | TFRC                | -1.244119166   | 0.022097264 | NINJ2        | -1.03573936    | 0.002018139 |
| HLA-DRB5          | 1.126678302    | 0.04176145  | ISM1      | 1.47371448     | 0.00800775 | CLASRP              | -1.127514006   | 0.030205002 | LG14         | -1.80790558    | 0.021603772 |
| SLC22A13          | 1.117547676    | 0.029316286 | C12orf5   | 1.4065678      | 0.00551568 | FAM83A-AS1          | -2.128722729   | 0.006993813 | MYOM1        | -1.39427005    | 0.014236148 |
|                   |                |             | CFTR      | 1.0345465      | 0.00771632 |                     |                |             |              |                |             |
|                   |                |             | EGR2      | 2.00644292     | 0.02349493 |                     |                |             |              |                |             |
|                   |                |             | RFTN1     | 1.18662751     | 0.00398026 |                     |                |             |              |                |             |
|                   |                |             | GPR182    | 1.28719289     | 0.00459148 |                     |                |             |              |                |             |

**Supplementary Table S6.** List of altered CpG sites in NASH livers, as compared with non- NASH livers

| Gene Name    | CpG        | Gene Name | CpG        | Gene Name | CpG        | Gene Name  | CpG        | Gene Name | CpG        |
|--------------|------------|-----------|------------|-----------|------------|------------|------------|-----------|------------|
| A2ML1        | cg12168926 | C1orf54   | cg06334965 | CYP2C19   | cg24857560 | FGD4       | cg11809958 | HMOX2     | cg02873098 |
| ABCC3        | cg18891141 | C20orf78  | cg19205181 | CYP7A1    | cg15805923 | FGF22      | cg23518439 | HNFA4     | cg23834593 |
| ACP5         | cg01524690 | C2orf54   | cg20140201 | DCC       | cg02835371 | FGFR1      | cg15791248 | HNRNP3    | cg01405920 |
| ACTN1        | cg04425263 | C5orf56   | cg03168315 | DEFB119   | cg13817555 | FKBP5      | cg21517946 | IDH3B     | cg27161589 |
| ADAMDEC1     | cg18212777 | C5orf66   | cg25768573 | DEFB121   | cg13795252 | FKBP5      | cg21517946 | IGF2      | cg08686462 |
| ADAMTS14     | cg26971530 | CAD       | cg25258016 | DEFB126   | cg01745599 | FGF22      | cg23518439 | IGSF8     | cg12390003 |
| ADAMTS16     | cg07834743 | CARD10    | cg16026346 | DEFB132   | cg08841021 | FGFR1      | cg15791248 | IKZF1     | cg01139861 |
| ADIG         | cg13816419 | CCDC122   | cg13487505 | DHRS7B    | cg19360316 | FKBP5      | cg21517946 | IL32      | cg20877076 |
| AKR1C4       | cg06573570 | CCDC129   | cg23825123 | DHRS7B    | cg05694098 | FLG        | cg19855573 | IPCEF1    | cg19690214 |
| AMPH         | cg14920797 | CCDC144NL | cg22570042 | DISP2     | cg17063840 | FOXI1      | cg07849278 | ISM1      | cg15577927 |
| ANKRD34C-AS1 | cg15981071 | CCDC15    | cg20250779 | DLGAP1    | cg25358264 | FOXO1      | cg02202169 | ITGA4     | cg25515269 |
| ANKS1B       | cg18299299 | CCDC166   | cg08435853 | DNAAF3    | cg09204255 | FYN        | cg08061598 | IYD       | cg08400967 |
| APH1B        | cg09264088 | CCDC166   | cg14540594 | DOC2A     | cg19699287 | GABARAP    | cg16879549 | KCNA3     | cg00995520 |
| APOBEC2      | cg09841052 | CCDC59    | cg03652173 | DOCK10    | cg19407684 | GALNT1     | cg16741573 | KCNK10    | cg01523348 |
| ARHGEF4      | cg09015973 | CCTRL2    | cg02601618 | DPYSL3    | cg13669166 | GAPDH5     | cg15729137 | KCNQ1     | cg23623667 |
| ARL4A        | cg07227033 | CDC23     | cg24961402 | DUSP1     | cg06819445 | GATM       | cg11032707 | KDM5B     | cg08718872 |
| ARL8A        | cg08649954 | CEACAM21  | cg04946843 | ECHDC2    | cg06600287 | GBA3       | cg17751101 | KIAA0319  | cg18433519 |
| ARPP21       | cg10504927 | CH13L1    | cg14085262 | EEF1D     | cg14824382 | GGA2       | cg05579124 | KIAA0319  | cg12349317 |
| ARSK         | cg11569235 | CHMP6     | cg00774579 | EFHD1     | cg17021917 | GGPS1      | cg10107779 | KIAA0319  | cg00944873 |
| ATCAY        | cg08000406 | CHST8     | cg24221853 | EIF2AK2   | cg23820429 | GPLD1      | cg02346062 | KIAA0319  | cg16906346 |
| ATG101       | cg18315870 | CHST9     | cg01960885 | EIF4ENIF1 | cg01782953 | GPR160     | cg14168775 | KIAA1191  | cg26260356 |
| ATG101       | cg05628902 | CLDN18    | cg20366986 | ELAC1     | cg20726616 | GPR75      | cg20081082 | KIF14     | cg22888029 |
| ATP5A1       | cg26626598 | CLEC18B   | cg27583026 | ELAVL4    | cg25217583 | GPS2       | cg12391328 | KLB       | cg06321636 |
| ATP6V0E2     | cg18934443 | CLEC3B    | cg22505962 | ELAVL4    | cg09784523 | GRAMD3     | cg06609646 | KLF5      | cg20314763 |
| ATP6V1G1     | cg14391907 | CLIC3     | cg23224755 | ELF1      | cg15040708 | GSDMB      | cg10057218 | KLK8      | cg18438253 |
| BATF         | cg21158815 | CLVS2     | cg20134787 | ELOVL3    | cg24362923 | GSX1       | cg10071824 | LDHAL6A   | cg06888460 |
| BCAT1        | cg20783223 | CMTM3     | cg12370353 | ENPP3     | cg12121052 | GTF2A2     | cg00368989 | LGALS8    | cg04027302 |
| BCL7A        | cg10552903 | CNBP      | cg02658964 | ESR1      | cg20583095 | GTF2IRD1   | cg07645228 | LILRA2    | cg23089880 |
| BCL7C        | cg13914857 | CNGA3     | cg00209520 | ETNK1     | cg21477262 | GULP1      | cg08913189 | LIMK2     | cg01606027 |
| BCL9L        | cg20029201 | CNNM1     | cg06312469 | EXPH5     | cg14140118 | GZMA       | cg13566919 | LINC01146 | cg24014326 |
| BDNF         | cg06260077 | CNTN1     | cg24360230 | FABP12    | cg18190353 | H19        | cg06658831 | LINC01168 | cg15681295 |
| BIN1         | cg02161262 | COLEC12   | cg21067023 | FAIM3     | cg17460386 | HAO1       | cg01478327 | LOC441666 | cg24527560 |
| BOLL         | cg10547527 | COX7A2    | cg25716013 | FAM118A   | cg00733150 | HARS2      | cg26273129 | LPFR1     | cg04778212 |
| BOLL         | cg06077337 | CR1       | cg25029035 | FAM193B   | cg18478850 | HAS3       | cg09944073 | LRRC10B   | cg06964190 |
| BRCA1        | cg14947218 | CRYBG3    | cg22429199 | FAM222A   | cg14544673 | HCST       | cg16001418 | LRRC55    | cg03717588 |
| BRCA1        | cg02286533 | CRYZL1    | cg16762072 | FAM60A    | cg01611280 | HDAC9      | cg19585556 | LRRTM1    | cg26157270 |
| C17orf98     | cg18343108 | CTSV      | cg24546976 | FBXO34    | cg18427465 | HIBCH      | cg06484496 | LRRTM3    | cg09455274 |
| C17orf98     | cg12552293 | CYB5R3    | cg18535283 | FCRLA     | cg05033369 | HIST1H2BE  | cg22942804 | LSP1      | cg15348841 |
| C19orf84     | cg11030887 | CYP2C19   | cg27505447 | FERMT1    | cg25325723 | HLF        | cg25534244 | LTBR      | cg10452531 |
|              |            |           |            |           |            |            |            |           |            |
| Gene Name    | CpG        | Gene Name | CpG        | Gene Name | CpG        | Gene Name  | CpG        | Gene Name | CpG        |
| MAD2L1       | cg14360823 | ORTD4     | cg04487907 | RGS14     | cg15591490 | SPSB2      | cg09080114 | VMO1      | cg24874612 |
| MAGOH        | cg03208983 | OSMR      | cg19609242 | RGS14     | cg11370586 | ST3GAL1    | cg02637438 | VPS39     | cg14774557 |
| MAL2         | cg02085119 | P2RX6     | cg09854409 | RGS4      | cg20056654 | ST6GALNAC2 | cg21914725 | WBP2NL    | cg08431931 |
| MANSC4       | cg13312247 | P2RX7     | cg08688169 | RGS5      | cg17683793 | ST6GALNAC4 | cg13886636 | WBP2NL    | cg04717802 |
| MARK3        | cg26623547 | PAK1IP1   | cg12409563 | RIBC2     | cg18180155 | STMN2      | cg13068285 | WBP2NL    | cg25099233 |
| MARS         | cg06714758 | PCDHA2    | cg27546766 | RIBC2     | cg05742863 | STT3A      | cg19571034 | WISP1     | cg13358979 |
| MBIP         | cg12645564 | PCDHA8    | cg02326566 | RIBC2     | cg00610021 | SUSD5      | cg03497399 | WNT3      | cg11142826 |
| MED9         | cg00723891 | PCDHB12   | cg17101542 | RNF14     | cg21256257 | SYNJ1      | cg18548246 | WNT9A     | cg05183226 |
| MFAP1        | cg12801082 | PCDHB12   | cg15548198 | RNF214    | cg04174309 | TAB2       | cg06416086 | YAP1      | cg12697442 |
| MGAT4A       | cg14223723 | PCDHB2    | cg23969338 | RNF25     | cg26548497 | TAGLN      | cg11861562 | ZBTB48    | cg19508900 |
| MGC27382     | cg13296396 | PCDHB4    | cg22648135 | RNPS1     | cg08301299 | TARSL2     | cg10526733 | ZCCHC4    | cg13975540 |
| MICAL3       | cg06200397 | PCP2      | cg03489492 | RORB      | cg14503744 | TBC1D1     | cg06331663 | ZFR2      | cg08098382 |
| MOBP         | cg27272723 | PDE4B     | cg10277218 | RPA3      | cg26322315 | TDRD6      | cg08426066 | ZNF197    | cg11557071 |
| MORF4L1      | cg20596706 | PDE4D     | cg04545873 | RPS6KL1   | cg12643970 | TDRD6      | cg11931223 | ZNF260    | cg24909706 |
| MRPL34       | cg01445659 | PEX2      | cg22944540 | RSPH6A    | cg02505812 | THAP1      | cg20173334 | ZNF287    | cg12597066 |
| MRPS10       | cg24613956 | PIAS3     | cg15978276 | RSPH6A    | cg07377422 | TMCO1      | cg10234330 | ZNF474    | cg18554917 |
| MTAP         | cg23850567 | PKIA      | cg04689061 | SAMD3     | cg09345868 | TMEM105    | cg21591452 | ZNF527    | cg19000959 |
| MVB12A       | cg02608002 | PLCD4     | cg18771537 | SCARNA6   | cg24516399 | TMEM105    | cg06727703 | ZNF883    | cg02199333 |
| MYOIC        | cg12741184 | PLIN1     | cg08749443 | SCML4     | cg08792995 | TMEM132E   | cg21745612 | ZP2       | cg18249108 |
| MYOCD        | cg18181954 | POTEA     | cg01192262 | SEC11C    | cg20600053 | TMEM194A   | cg01217666 |           |            |
| NCCR1        | cg18627816 | PPBP      | cg20543211 | SENPI     | cg12381317 | TMEM200B   | cg15307678 |           |            |
| NDUFAF3      | cg07109801 | PPM1A     | cg14785542 | SETD9     | cg06961054 | TMEM200B   | cg22788029 |           |            |
| NDUFB10      | cg07623113 | PSG6      | cg20120646 | SETD9     | cg06795995 | TMEM217    | cg18131329 |           |            |
| NKX6-2       | cg17996619 | PTCHD3    | cg09544380 | SHD       | cg24830664 | TMEM217    | cg00480799 |           |            |
| NLRP6        | cg09205751 | PTH2      | cg22250242 | SHPK      | cg21817720 | TNFAIP8L2  | cg22392857 |           |            |
| NOSIP        | cg06468619 | PTPN7     | cg01520554 | SIRT6     | cg05075545 | TRAPPC1    | cg10518440 |           |            |
| NRON         | cg09518226 | PWWP2A    | cg20433356 | SLC10A5   | cg20769419 | TRIM7      | cg16027343 |           |            |
| NUDT21       | cg14837652 | PYCARD    | cg09115984 | SLC15A5   | cg26345444 | TRIM8      | cg00793774 |           |            |
| OLFM3        | cg16510022 | RAB1B     | cg25618573 | SLC29A2   | cg07183539 | TRIP10     | cg18732869 |           |            |
| OLFML2A      | cg25612362 | RAB1B     | cg04592747 | SLC6A4    | cg06841846 | TRIT1      | cg04921771 |           |            |
| OR14I1       | cg25289056 | RAB1B     | cg15201417 | SLC7A8    | cg21380590 | TRPC6      | cg07898145 |           |            |
| OR1A2        | cg03271520 | RAB31     | cg04995377 | SMG6      | cg27337217 | TSACC      | cg19759212 |           |            |
| OR2L8        | cg16077391 | RAB37     | cg08080145 | SNCB      | cg25444839 | TWIST1     | cg14391419 |           |            |
| OR2L8        | cg18857759 | RALGAPB   | cg15971382 | SND1      | cg04345581 | TXNL1      | cg00152799 |           |            |
| OR4D1        | cg12463722 | RANBP3    | cg08371934 | SND1      | cg11539674 | TYW3       | cg12981534 |           |            |
| OR4D1        | cg20221991 | RAPGEF1   | cg15815515 | SNORA71C  | cg11363483 | UCHL3      | cg07830652 |           |            |
| OR4D2        | cg24269480 | RASSF5    | cg16122716 | SNX13     | cg06049192 | UGT3A2     | cg10402936 |           |            |
| OR51B2       | cg12036731 | RBKS      | cg16651262 | SPDYC     | cg03196265 | UTS2       | cg15727920 |           |            |
| OR51Q1       | cg05975928 | RET       | cg01289552 | SPRR2C    | cg07804289 | VIL1       | cg18970338 |           |            |

**Supplementary Table S7.** List of antibodies and dilutions used in immunoblot analyses

| Antigen                      | Primary Antibody                                                    | Dilution | Secondary Antibody                                                 | Dilution |
|------------------------------|---------------------------------------------------------------------|----------|--------------------------------------------------------------------|----------|
| <b>4-HNE</b>                 | 4-HNE antibody, #393206<br>(Millipore)                              | 1:1000   | Goat $\alpha$ -rabbit HRP, P0448<br>(Dako Agilent, Santa Clara CA) | 1:5000   |
| <b>Actin</b>                 | Pan-Actin antibody, #4968<br>(Cell signalling, Danvers, MA)         | 1:10000  | Goat $\alpha$ -mouse, HRP, 1D3<br>(Dako Agilent, Santa Clara CA)   | 1:5000   |
| <b>AMPK-pT172</b>            | pAMPK Antibody, #2531<br>(Cell signalling, Danvers, MA)             | 1:1000   | Goat $\alpha$ -rabbit HRP, P0448<br>(Dako Agilent Santa Clara CA)  | 1:5000   |
| <b>AMPK</b>                  | AMPK Antibody #2532S<br>(Cell signalling, Danvers, MA)              | 1:1000   | Goat $\alpha$ -rabbit HRP, P0448<br>(Dako Agilent, Santa Clara CA) | 1:5000   |
| <b>AKT-pT308</b>             | p-Akt Antibody, #4056<br>(Cell signalling, Danvers, MA)             | 1:1000   | Goat $\alpha$ -rabbit HRP, P0448<br>(Dako Agilent, Santa Clara CA) | 1:5000   |
| <b>AKT-pT473</b>             | p-Akt Antibody, #4060<br>(Cell signalling, Danvers, MA)             | 1:1000   | Goat $\alpha$ -rabbit HRP, P0448<br>(Dako Agilent, Santa Clara CA) | 1:5000   |
| <b>AKT</b>                   | AKT Antibody, #4685<br>(Cell signalling, Danvers, MA)               | 1:1000   | Goat $\alpha$ -rabbit HRP, P0448<br>(Dako Agilent, Santa Clara CA) | 1:5000   |
| <b>ATG5</b>                  | ATG7 Antibody, #12994<br>(Cell signalling, Danvers, MA)             | 1:1000   | Goat $\alpha$ -rabbit HRP, P0448<br>(Dako Agilent, Santa Clara CA) | 1:5000   |
| <b>mTOR-pS2448</b>           | p-mTOR Antibody, #2971<br>(Cell signalling, Danvers, MA)            | 1:1000   | Goat $\alpha$ -rabbit HRP, P0448<br>(Dako Agilent, Santa Clara CA) | 1:2000   |
| <b>mTOR</b>                  | mTOR Antibody, #2972<br>(Cell signalling, Danvers, MA)              | 1:200    | Goat $\alpha$ -rabbit HRP, P0448<br>(Dako Agilent, Santa Clara CA) | 1:2000   |
| <b>S6-pS235/236</b>          | p-S6 Antibody, #4856<br>(Cell signalling, Danvers, MA)              | 1:1000   | Goat $\alpha$ -rabbit HRP, P0448<br>(Dako Agilent, Santa Clara CA) | 1:5000   |
| <b>S6</b>                    | S6 Antibody, #2217<br>(Cell signalling, Danvers, MA)                | 1:1000   | Goat $\alpha$ -rabbit HRP, P0448<br>(Dako Agilent, Santa Clara CA) | 1:5000   |
| <b>S6K-pS235/236</b>         | p-S6K Antibody, #9205<br>(Cell signalling, Danvers, MA)             | 1:1000   | Goat $\alpha$ -rabbit HRP, P0448<br>(Dako Agilent, Santa Clara CA) | 1:5000   |
| <b>S6K</b>                   | S6K Antibody, #2708<br>(Cell signalling, Danvers, MA)               | 1:1000   | Goat $\alpha$ -rabbit HRP, P0448<br>(Dako Agilent, Santa Clara CA) | 1:5000   |
| <b>BAX</b>                   | BAX Antibody, #5023<br>(Cell signalling, Danvers, MA)               | 1:1000   | Goat $\alpha$ -rabbit HRP, P0448<br>(Dako Agilent, Santa Clara CA) | 1:5000   |
| <b>4EBP1-pT37/46</b>         | p-4E-BP1 Antibody, #2855<br>(Cell signalling, Danvers, MA)          | 1:1000   | Goat $\alpha$ -rabbit HRP, P0448<br>(Dako Agilent, Santa Clara CA) | 1:5000   |
| <b>p62/SQSTM1</b>            | SQSTM1 / p62 Antibody, #5114<br>(Cell signalling, Danvers, MA)      | 1:1000   | Goat $\alpha$ -rabbit HRP, P0448<br>(Dako Agilent, Santa Clara CA) | 1:5000   |
| <b>Caspase 3</b>             | Cleaved Caspase-3 Antibody, #9664<br>(Cell signalling, Danvers, MA) | 1:1000   | Goat $\alpha$ -rabbit HRP, P0448<br>(Dako Agilent, Santa Clara CA) | 1:5000   |
| <b>Caspase 8</b>             | Caspase-8 Antibody, #9746<br>(Cell signalling, Danvers, MA)         | 1:1000   | Goat $\alpha$ -rabbit HRP, P0448<br>(Dako Agilent, Santa Clara CA) | 1:5000   |
| <b>Caspase 9</b>             | Caspase-9 Antibody, C7729<br>(Sigma, Saint Louis, MO)               | 1:1000   | Goat $\alpha$ -rabbit HRP, P0448<br>(Dako Agilent, Santa Clara CA) | 1:5000   |
| <b>SAPK/Jnk-p</b>            | SAPK/JNK-p Antibody, #9251<br>(Cell signalling, Danvers, MA)        | 1:1000   | Goat $\alpha$ -rabbit HRP, P0448<br>(Dako Agilent, Santa Clara CA) | 1:5000   |
| <b>MAK (Erk1/2) p-P44/42</b> | p-P44/42 ERK1/2 Antibody, #9101<br>(Cell signalling, Danvers, MA)   | 1:1000   | Goat $\alpha$ -rabbit HRP, P0448<br>(Dako Agilent, Santa Clara CA) | 1:5000   |
| <b>MAPK (Erk1/2) P44/42</b>  | P44/42 ERK1/2 Antibody, #9102<br>(Cell signalling, Danvers, MA)     | 1:1000   | Goat $\alpha$ -rabbit HRP, P0448<br>(Dako Agilent, Santa Clara CA) | 1:5000   |
| <b>IL10</b>                  | IL10 antibody, ab34843<br>(Abcam, Cambridge, UK)                    | 1:1000   | Goat $\alpha$ -rabbit HRP, P0448<br>(Dako Agilent, Santa Clara CA) | 1:5000   |
| <b>MFN2</b>                  | MFN2 Antibody, ab127773<br>(Abcam)                                  | 1:1000   | Goat $\alpha$ -rabbit HRP, P0448<br>(Dako Agilent, Santa Clara CA) | 1:5000   |



|                    |                                                              |        |                                                                            |        |
|--------------------|--------------------------------------------------------------|--------|----------------------------------------------------------------------------|--------|
| <b>NFKB</b>        | NFKB p65 Antibody, #8242<br>(Cell signalling, Danvers, MA)   | 1:1000 | Goat $\alpha$ -rabbit HRP, P0448<br>(Dako Agilent, Santa Clara CA)         | 1:5000 |
| <b>OXPPOS</b>      | OXPPOS Antibody, ab110411<br>(Abcam)                         | 1:250  | Goat $\alpha$ -mouse, HRP, 1D3<br>(Dako Agilent, Santa Clara CA)           | 1:5000 |
| <b>p38</b>         | p-p38 MAPK Antibody, #9211<br>(Cell signalling, Danvers, MA) | 1:1000 | Goat $\alpha$ -rabbit HRP, P0448<br>(Dako Agilent, Santa Clara CA)         | 1:5000 |
| <b>STAT3-pT705</b> | p-STAT3 Antibody, #9145<br>(Cell signalling, Danvers, MA)    | 1:1000 | Goat $\alpha$ -rabbit HRP, P0448<br>(Dako Agilent, Santa Clara CA)         | 1:5000 |
| <b>STAT3</b>       | STAT3 Antibody, #9139<br>(Cell signalling, Danvers, MA)      | 1:1000 | Goat $\alpha$ -mouse HRP, P0447<br>(Dako, Agilent, Santa Clara CA,<br>USA) | 1:5000 |
| <b>LC3B</b>        | LC3B Antibody, #2775S<br>(Cell signalling, Danvers, MA)      | 1:1000 | Goat $\alpha$ -rabbit HRP, P0448<br>(Dako Agilent, Santa Clara CA)         | 1:5000 |
| <b>LAMP2A</b>      | LAMP2A Antibody, ab125068<br>(Abcam)                         | 1:1000 | Goat $\alpha$ -rabbit HRP, P0448<br>(Dako Agilent, Santa Clara CA)         | 1:5000 |
| <b>FASN</b>        | FASN Antibody, #3180<br>(Cell signalling, Danvers, MA)       | 1:1000 | Goat $\alpha$ -rabbit HRP, P0448<br>(Dako Agilent, Santa Clara CA)         | 1:5000 |
| <b>TOM20</b>       | Tom20 Antibody, #42406<br>(Cell signalling, Danvers, MA)     | 1:1000 | Goat $\alpha$ -rabbit HRP, P0448<br>(Dako Agilent, Santa Clara CA)         | 1:5000 |
| <b>MFN2</b>        | MFN2 Antibody, ab127773<br>(Abcam)                           | 1:1000 | Goat $\alpha$ -rabbit HRP, P0448<br>(Dako Agilent, Santa Clara CA)         | 1:5000 |
| <b>FAH</b>         | FAH Antibody, #ABN526<br>(Millipore, Massachusetts, MA)      | 1:1000 | Goat $\alpha$ -rabbit HRP, P0448<br>(Dako Agilent, Santa Clara CA)         | 1:5000 |
| <b>GADPH</b>       | GADPH Antibody, #2118<br>(Cell signalling, Danvers, MA)      | 1:8000 | Goat $\alpha$ -rabbit HRP, P0448<br>(Dako Agilent, Santa Clara CA)         | 1:5000 |

**Supplementary Table S8.** List of reagents and procedures provided via Taqman® gene expression assays used in quantitative RT-PCR. The expressions of housekeeping gene 18S (Hs03928985\_g1) were used for calculations

| Gene expression assay        | Gene name                                  |
|------------------------------|--------------------------------------------|
| <b>αKGDH</b> Hs01081865_m1   | Alpha-Ketoglutarate Dehydrogenase          |
| <b>ACACA</b> Hs01046047_m1   | Acetyl-CoA Carboxylase Alpha               |
| <b>ACLY</b> Hs00153764_m1    | ATP citrate lyase                          |
| <b>IDH1</b> Hs00271858_m1    | Isocitrate Dehydrogenase 1                 |
| <b>IDH2</b> Hs00953881_m1    | Isocitrate Dehydrogenase 2                 |
| <b>IDH3A</b> Hs00194253_m1   | Isocitrate Dehydrogenase 3A                |
| <b>GSL1</b> Hs00248163_m1    | Glutaminase                                |
| <b>GLUD1</b> Hs03989560_s1   | Glutamate Dehydrogenase 1                  |
| <b>PC</b> Hs00559398_m1      | Pyruvate Carboxylase                       |
| <b>SDHB</b> Hs01042482_m1    | Succinate Dehydrogenase B                  |
| <b>ACP5</b> Hs00356261_m1    | Acid Phosphatase 5, Tartrate Resistant     |
| <b>ARL8A</b> Hs00373395_m1   | ADP Ribosylation Factor Like GTPase 8A     |
| <b>C1orf54</b> Hs04398113_m1 | Chromosome 1 Open Reading Frame 54         |
| <b>DISP2</b> Hs00394338_m1   | Dispatched RND Transporter Family Member 2 |
| <b>HDAC9</b> Hs00206843_m1   | Histone Deacetylase 9                      |
| <b>MARK3</b> Hs01058270_m1   | Microtubule Affinity Regulating Kinase 3   |
| <b>RAB31</b> Hs00199313_m1   | RAB31, Member RAS Oncogene Family          |
| <b>TDRD6</b> Hs01597145_m1   | Tudor Domain Containing 6                  |
| <b>TRIP10</b> Hs01012747_m1  | Thyroid Hormone Receptor Interactor 10     |
| <b>UGT3A2</b> Hs04177793_m1  | UDP Glycosyltransferase Family 3 Member A2 |
| <b>ZNF197</b> Hs01560359_m1  | Zinc Finger Protein 197                    |

## Supplementary methods

### Extended Study design and participants

Patients are included consecutively after previous failure in management after dietary treatments, changes in lifestyle factors and psychological assessment. We matched as closely as possible patients with and without NASH, and NASH patients agreed to have a second liver biopsy at 1 year after successful surgery. Before surgery, the drug schedule was revised and some were interrupted, especially metformin, to avoid described side effects. Some drugs were again prescribed after surgery according to the clinical follow-up. Some variables depicted in Table S8 indicated that weight loss and improvement of glucose and lipid metabolism were fully achieved during the first year. When necessary, healthy non-obese controls were used as described. <sup>1</sup> Clinical indication for laparoscopic sleeve gastrectomy (LSG) was according to guidelines currently used in pre-operative evaluation. We excluded patients with current, or past, history of daily alcohol abuse ( $\geq 30$  g for men and  $\geq 20$  g for women), long-term consumption of hepatotoxic drugs, and liver disease of infectious origin. LSG was performed under general anaesthesia with the patient in the Lloyd-Davies position. A five-port technique was used in all patients. The greater gastric curvature was dissected, separated from the gastroepiploic arcade of the greater omentum, and continued to the His angle. The gastric transection was performed under the guidance of a 38-Fr Faucher bougie. Three cm was the distance from the pylorus to the first section point. The suture line was reinforced using polycarbonate derivatives of polyglycolic acid to avoid haemorrhages and leaks. A methylene blue leak was always performed before closing abdominal wall. <sup>2,3</sup>

### Transmission electron microscopy

Small pieces of the liver were first fixed in a 2% glutaraldehyde solution (pH 7.4), washed with 0.1 M cacodylate and then fixed with osmium tetroxide. Thick sections stained with 1% toluidine blue were used to identify the area of interest, and ultra thin sections (70 nm) were used for examination after staining with uranyl acetate and lead citrate.

### Immunoblotting analysis and quantification

The uncropped blots corresponding to those presented in the Figures of the main article are shown in Figure S13. Homogenates for western blot analyses were obtained from either the liver samples or cell cultures. The proteins were resolved in 8% or 14% polyacrylamide gels by SDS-PAGE and transferred to polyvinylidene difluoride or nitrocellulose membranes (Thermo Fisher, Barcelona, Spain). The sources and dilutions of the primary and secondary antibodies may be found in Table S7. The immunoreactive bands were visualised using the SuperSignal West Femto chemiluminescent substrate (Pierce, Rockford, IL, USA), and the analysis was performed with a ChemiDoc system (Bio-Rad Laboratories, Madrid, Spain). Fumarylacetoacetate hydrolase (FAH) is used as a loading control. The bands were analysed and quantified using Image Lab 2.0 software (Bio-Rad Laboratories). All WB quantifications were normalized with the housekeeping FAH or by the ratio of total protein vs. phosphorylated protein. Phosphorylated proteins (pAKT, pAMPK, pMTOR, pS6k, and pS6) were developed and then stripped to determine total proteins. To remove primary and secondary antibodies we used 62.5 mM Tris-HCl, pH 6.7 buffer with 100 mM b-mercaptoethanol, and 2% SDS. We incubated 15 minutes at 50°C and then we washed the membranes with TBST 5 minutes 10 times before blocking.

## **Immunocytochemistry**

After the deparaffinisation and rehydration of the liver sections, the antigens were retrieved in 0.15 M sodium citrate buffer at pH 6 in a microwave oven up to 90°C. Immunocytochemistry was performed using antibodies against 4-hydroxy-2-nonenal and paraoxonase-1. The cells stained for specific markers were quantified using ImageJ software (National Institutes of Health, Bethesda, MD, USA). The percentage of apoptotic nuclei in liver biopsies was determined by a colorimetric terminal deoxynucleotidyl transferase-mediated dUTP nick end labelling (TUNEL) assay (Click-iT™ TUNEL, Invitrogen, Thermo Fisher, Waltham, MA, USA) according to the manufacturer's instructions.

## **Quantitative targeted metabolomics platforms**

To measure the metabolites from energy metabolism, we used a 7890A gas chromatograph coupled with an electron impact source to a 7200-quadrupole time-of-flight mass spectrometer (Agilent Technologies, Santa Clara, USA). The analysis of metabolites from one-carbon metabolism was performed with an ultrahigh-pressure liquid chromatography-quadrupole time-of-flight mass spectrometer (Agilent Technologies). Liquid chromatography was also used in separate analyses to quantify the amounts of guanine, 5-methylcytosine and 5-hydroxymethylcytosine.

## **DNA and RNA isolation**

DNA and RNA were isolated according to the instructions of the Qiagen QIAmp DNA Micro Kit and the Qiagen RNeasy Lipid Tissue Mini Kit (Werfen, Barcelona, Spain), respectively. The concentrations of DNA and RNA were determined using a NanoDrop ND-1000 spectrophotometer (Nanodrop Technologies Inc., Wilmington, NC). The RNA integrity number (score > 8) was assessed using an RNA2100 Bioanalyser (Agilent Technologies, Santa Clara, CA) with the RNA 6000 Nano Kit.

## **Quantitative real-time PCR**

RNA was reverse-transcribed into cDNA using the Reverse Transcription System (Applied Biosystems, Foster City, CA). Quantitative gene expression analyses were conducted on a 7900HT Fast Real-Time PCR System using the reagents provided by the respective TaqMan® Gene Expression Assays (Applied Biosystems) indicated in Table S8. All the measurements were normalised to the expression of the housekeeping gene 18S using standard procedures.

## **Microarray-based DNA methylation analysis**

The samples included in the study were fresh-frozen human livers. DNA extraction, bisulfite conversion, site-specific oxidation and array hybridisation to the 850K microarrays was performed with Infinium human methylation EPIC beadchip array technology according to the manufacturer's instructions (Illumina, San Diego, CA).

## **Microarray-based gene expression analysis**

One hundred nanograms of total RNA purified from the livers was used to produce cyanine 3-CTP-labeled cRNA using the Quick Amp Labeling kit, and 3 µg of labelled cRNA was hybridised to the Sureprint G3 human gene expression 8x60k v2 microarray according to the manufacturer's protocol (Agilent, Palo Alto, CA). The arrays were scanned in an Agilent Microarray Scanner, and the raw data were extracted using Agilent Feature Extraction 10.7.3.1.

## **Cell culture and flow cytometry analysis**

HepG2 cells were obtained from ATTC and grown in high-glucose DMEM (GIBCO) supplemented with 10% fetal bovine serum, 2 mM glutamine, 1% penicillin and streptomycin and nonessential amino acids at 37°C in a humidified atmosphere with 5% CO<sub>2</sub>. The experiments were performed by adding permeable  $\alpha$ -KG (dimethyl- $\alpha$ -ketoglutarate; DMKG) at final concentrations ranging from 0.1 to 2 mM for 72 h and/or metformin at a final concentration of 10 mM. To estimate the percentage of cell death, the cells were detached and mixed with trypan blue to be analysed using the TC20 automated cell counter (Bio-Rad) according to the manufacturer's instructions. After the respective treatments, the cells were either washed two times with phosphate-buffered saline (PBS) and stored at -80°C until the extraction and quantification of metabolites or, for immunoblot assays, the media were replaced with RIPA buffer containing protease and phosphatase inhibitors (P8340, P0044 from Sigma). When required, the cells were stained with annexin V and

propidium iodide for analysis using a BDFACS Canto BD-Biosciences flow cytometer, and the data were assessed using the free software Flowing.

### Primary hepatocyte isolation

Primary hepatocytes were isolated from the livers of 5-month-old wild type C57BL/6 J male mice as described.<sup>4</sup> In brief, livers were perfused with Hank's Balanced Salt Solution (Invitrogen) containing 5 mM glucose supplemented with 0.5 mM EGTA and 25 mM HEPES (pH 7.4 at 37°C) using a CTP100 peristaltic pump (ThermoFisher). After exsanguination of the liver, perfusion was changed to DMEM (Sigma-Aldrich D5546) supplemented with 100 U/mL Penicillin and 0.1 mg/mL Streptomycin (Pen/Strep), 15 mM HEPES, and 100 U/mL of collagenase (Type IV, Worthington). Then cells were liberated and cell suspension was then filtered through a 70 µm cell strainer and centrifuged at 50 g x 2 min 3 times. Following centrifugation, cell pellets were resuspended in DMEM (Sigma-Aldrich D5796) supplemented with Pen/Strep, 5 mM HEPES, 10 nM dexamethasone, and seeded into 6-well plates or 24-well Seahorse plates precoated with collagen I (Sigma-Aldrich). One hour later the media was changed to DMEM (Sigma-Aldrich D5546) supplemented with Pen/Strep, 5 mM HEPES, 10 nM dexamethasone and 10% FBS. Media was changed 3 h later to serum-free Earl's balanced salts (Sigma-Aldrich E2888) supplemented with Pen/Strep, 5 mM HEPES, 10 nM dexamethasone, glucose (1,75 g/l) and sodium pyruvate (1mM), treated or not with metformin and/or DMKG. Cells were cultured for 38 hours for various experiments. After 38 hours of culture, hepatocytes were frozen in liquid nitrogen and lysed in RIA assay buffer (20 mM Tris-HCl (pH 7.5), 150 mM NaCl, 1 mM Na<sub>2</sub>EDTA, 1 mM EGTA, 1% NP-40, 1% sodium deoxycholate) with protease and phosphatase inhibitors P0044, P5725 and P8340.

### Oxygen consumption and ECAR

Mitochondrial bioenergetics of primary hepatocytes was measured using an XF24 Extracellular Flux Analyzer (Agilent).<sup>5</sup> After 38 hours of culture, cells were washed with Seahorse assay media (Seahorse Bioscience). Plates were incubated in a CO<sub>2</sub>-free incubator at 37 °C for 1 h to allow temperature and pH equilibration, after which oxygen consumption rate (OCR) was measured in the XF24 Extracellular Flux Analyzer over a period of 88 min. Mitochondrial processes were examined through sequential injections of oligomycin (4 µM) at min 27, carbonyl cyanide 4-(trifluoromethoxy) phenylhydrazone (FCCP; 2 µM) at min 52, rotenone (1µM) at min 78, and antimycin A (5 µM) at min 104. ECAR was determined under basal culture conditions.

### Bioinformatics

To analyse the gene expression microarray, spot signals were normalised with Agilent Gene Spring GX v14.8 software and filtered to keep only the autosomal genes for further comparisons (20,214 genes) in R. Using the t.test function, we determined significance of expression difference between NASH and Non-NASH patients (n = 8 each). We determined 345 genes to have  $p < 0.05$  and  $\log_2(\text{NASH/Non-NASH}) > 1$ . All RNA expression data were used for the integration of DNA methylation and gene expression data (see below). For the DNA methylation array, the raw data were analysed using the minfi package in R with annotations from Illumina Human Methylation EPICmanifest v0.3.0 and Illumina Human Methylation EPICanno.ilm10b2.hg19 v0.6.0. The data were normalised and filtered to keep only the autosomal CpGs using the preprocess Quantile function with mergeManifest=T and dropLociWithSnps() with snps=c("SBE", "CpG", "Probe") and maf=0 parameters. Each CpG has a beta value (calculated using getBeta), which is the fraction of methylated / methylated + unmethylated signal, bound between 0 and 1. We performed Wilcoxon rank-sum tests on each CpG (n = 8 for each group) to determine significant differences. We also determined the average beta level in NASH and Non-NASH patients and then retained the CpGs whose average  $\Delta$  beta > 0.05 and whose p-value < 0.05 as significantly differentially methylated. Subsets of CpGs across features of the genome were annotated using the genomation package with hg19 knownGene files downloaded from the UCSC Table Browser, as described. The gplots package was used for heatmap visualisation. To assess the relationship between CpG methylation and gene expression, we merged the differentially methylated CpGs in gene promoters with the RNA microarray data and correlated beta and expression values. *Circos* visualization

was generated using the *circlize* package. Kyoto Encyclopedia of Genes and Genome (KEGG) pathway analysis of selected genes subsets was performed.

## References

1. Aranda N, Viteri FE, Montserrat C, Arija V. Effects of C282Y, H63D, and S65C HFE gene mutations, diet, and life-style factors on iron status in a general Mediterranean population from Tarragona, Spain. *Ann Hematol* 2010; **89**: 767–73
2. Mechanick JI, Apovian C, Brethauer S, Garvey WT, Joffe AM, Kim J, et al. Clinical practice guidelines for the perioperative nutrition, metabolic, and nonsurgical support of patients undergoing bariatric procedures. *Surg Obes Relat Dis* 2020; **16**: 175–247
3. Vives M, Molina A, Danús M, Rebenaque E, Blanco S, París M, et al. Analysis of gastric physiology after laparoscopic sleeve gastrectomy (LSG) with or without antral preservation in relation to metabolic response: a randomised study. *Obes Surg* 2017; **27**: 2836–2844
4. Zhang W, Sargis RM, Volden PA, Carmean CM, Sun XJ, Brady MJ. PCB 126 and other dioxin-like PCBs specifically suppress hepatic PEPCK expression via the aryl hydrocarbon receptor. *PLoS One* 2012; **7**: e37103.
5. Qiao A, Jin X, Pang J, Moskophidis D, Mivechi NF. The transcriptional regulator of the chaperone response HSF1 controls hepatic bioenergetics and protein homeostasis. *J Cell Biol* 2017; **216**:723–741
